# Supplementary material for: Plasma Processing Conditions Substantially Influence Circulating microRNA Biomarker Levels
Source: PLoS One. 2013 Jun 7;8(6):e64795. doi: 10.1371/journal.pone.0064795 (PMC3676411; doi:10.1371/journal.pone.0064795)
Supplement: Table S1 — Top 10 Expressing miRNAs in Standard Plasma with Corresponding Expression Rank in Differently Processed Plasma. (XLSX) [file pone.0064795.s003.xlsx]

## Sheet: Sheet1
	plateletCONC rank	plasmaSTD rank	plasmaFILT rank
hsa-miR-223	1	1	4
hsa-miR-16	3	2	2
hsa-miR-451	28	3	1
hsa-miR-126	2	4	7.5
hsa-miR-92a	11	5	4
hsa-miR-26a	5	6	31
hsa-miR-21	7	7	11.5
hsa-miR-24	5	8	16
hsa-miR-486-5p	41.5	9	5
hsa-miR-20a	9	10	6
