# Supplementary material for: Plasma Processing Conditions Substantially Influence Circulating microRNA Biomarker Levels
Source: PLoS One. 2013 Jun 7;8(6):e64795. doi: 10.1371/journal.pone.0064795 (PMC3676411; doi:10.1371/journal.pone.0064795)
Supplement: Table S2 — Table of Differentially Expressed miRNAs in Plasma vs Serum. (XLSX) [file pone.0064795.s004.xlsx]

## Sheet: >5fold exp diff serum vs plasma
Highlighted Differences in miRNA Expression Between Plasma and Serum
	Target Name	Plasma 1-2	Plasma 2-2	Ave Plasma	Serum 1-2	Serum 2-2	Ave Serum	Ave CT Difference	Fold difference in expression plasma vs serum	P value (T test)
≥5-fold higher in serum compared to plasma	hsa-miR-602	40	40	40	37.3027	36.6722	36.9874	-3.01258	0.123915	0.010775
	hsa-miR-199b-5p	40	40	40	37.9028	37.4602	37.6815	-2.31854	0.200471	0.0089872
≥5-fold higher in plasma compared to serum	hsa-miR-403	38.0119	37.3223	37.6671	40	40	40	2.33294	5.0383	0.0211531
	hsa-let-7a	28.0774	28.5246	28.301	30.9274	30.3641	30.6457	2.34476	5.07975	0.0227278
	hsa-miR-99b	30.0468	30.0931	30.0699	32.4002	32.514	32.4571	2.38714	5.2312	0.000661837
	hsa-let-7e	30.0655	30.3764	30.2209	32.3813	32.9664	32.6739	2.45292	5.47523	0.0177534
	hsa-miR-26a	25.108	25.2213	25.1647	27.8562	27.4074	27.6318	2.46717	5.52959	0.00868469
	hsa-miR-766	30.0852	30.5561	30.3206	32.5052	33.1409	32.823	2.5024	5.66628	0.0240855
	hsa-miR-146a	29.3914	29.755	29.5732	32.4632	31.7161	32.0897	2.51645	5.72172	0.0261872
	hsa-miR-199a-3p	29.2993	30.4675	29.8834	32.3788	32.4617	32.4202	2.53682	5.80308	0.0493697
	hsa-miR-374b	29.3952	29.3784	29.3868	32.1641	31.816	31.9901	2.60327	6.07661	0.00445091
	hsa-miR-296-5p	37.2058	37.3639	37.2848	40	40	40	2.71516	6.56667	0.000846089
	hsa-miR-151-5p	27.5168	28.3214	27.9191	30.5885	31.0655	30.827	2.90787	7.50507	0.0249052
	hsa-let-7f	27.2678	27.1961	27.2319	30.5749	30.0389	30.3069	3.07499	8.4268	0.00764314
	hsa-miR-98	33.7408	34.0255	33.8831	36.8401	37.2452	37.0426	3.15951	8.93527	0.00608402
	hsa-miR-224	35.4618	36.419	35.9404	39.1336	39.6193	39.3764	3.436	10.8228	0.023536
	hsa-miR-382	32.5059	31.6501	32.078	36.3268	35.5804	35.9536	3.87556	14.6778	0.0207965

## Sheet: Sheet1
Well	Target Name	Plasma_SP3-2	Plasma_SP4-2	avg plasma	Serum_SP3-2	Serum_SP4-2	avg serum	difference of avg	Ttest
314	U6	37.0474	33.3164	35.1819	31.5952	30.0549	30.8251	-4.3568	0.16352
138	hsa-miR-665	39.3034	36.7521	38.0277	35.0881	34.6195	34.8538	-3.17394	0.134181
240	hsa-miR-602	40	40	40	37.3027	36.6722	36.9874	-3.01258	0.010775
74	SNORD49A	35.4015	35.0398	35.2206	33.0165	31.5156	32.266	-2.95457	0.0619841
19	hsa-miR-199b-5p	40	40	40	37.9028	37.4602	37.6815	-2.31854	0.0089872
335	hsa-miR-921	40	40	40	40	35.6568	37.8284	-2.17159	0.42265
108	hsa-miR-185*	40	40	40	35.7268	40	37.8634	-2.13658	0.42265
77	hsa-miR-141	35.6235	40	37.8118	37.3141	34.5152	35.9146	-1.89715	0.541124
354	hsa-miR-576-3p	40	40	40	40	36.8365	38.4182	-1.58175	0.42265
157	hsa-miR-548b-3p	40	40	40	40	37.0029	38.5015	-1.49853	0.42265
14	hsa-miR-31*	40	40	40	40	37.5224	38.7612	-1.23882	0.42265
238	hsa-miR-133a	38.9024	39.4613	39.1818	40	35.9033	37.9517	-1.23018	0.612163
184	hsa-miR-572	40	40	40	38.9079	38.6799	38.7939	-1.2061	0.00882024
41	hsa-miR-671-5p	36.998	36.5231	36.7606	35.5991	35.6898	35.6445	-1.1161	0.0438382
40	hsa-miR-381	38.3407	38.3284	38.3345	37.8507	36.9239	37.3873	-0.947223	0.177649
349	hsa-miR-886-3p	40	38.7209	39.3605	40	36.9508	38.4754	-0.885058	0.645983
213	hsa-miR-205	34.9976	36.6767	35.8372	34.5704	35.3638	34.9671	-0.870072	0.447669
59	hsa-miR-369-5p	40	33.944	36.972	36.9141	35.3926	36.1533	-0.818693	0.817686
359	hsa-miR-33b	40	37.4999	38.75	40	35.873	37.9365	-0.813451	0.768087
284	hsa-miR-202*	40	40	40	40.0194	38.4013	39.2104	-0.789641	0.43199
312	hsa-miR-345	34.231	39.153	36.692	36.5964	35.238	35.9172	-0.774765	0.790191
278	hsa-miR-520d-5p	40	40	40	38.497	40	39.2485	-0.751518	0.42265
257	hsa-miR-96	40	39.4755	39.7377	40	37.9796	38.9898	-0.747943	0.547986
275	hsa-miR-298	40	40	40	40	38.6168	39.3084	-0.691609	0.42265
358	hsa-miR-886-5p	35.7249	34.6876	35.2063	34.3985	34.6383	34.5184	-0.687861	0.325485
88	hsa-miR-570	40	38.2553	39.1276	40	36.8829	38.4414	-0.686206	0.737835
165	hsa-miR-302d*	40	40	40	38.8308	40	39.4154	-0.584612	0.42265
171	hsa-miR-144	29.7287	32.479	31.1039	31.914	29.2142	30.5641	-0.539785	0.805697
193	hsa-miR-19b	25.9678	28.4047	27.1862	27.599	25.7039	26.6515	-0.534773	0.762054
69	hsa-miR-193b	35.427	34.3382	34.8826	35.8536	32.8812	34.3674	-0.515158	0.42265
324	hsa-miR-30b*	37.1237	40.0161	38.5699	36.1442	40	38.0721	-0.497786	0.855484
271	hsa-miR-615-3p	36.6442	36.7941	36.7191	35.8415	36.6757	36.2586	-0.460581	0.39066
366	hsa-miR-365	34.6073	33.9033	34.2553	34.9588	32.6645	33.8117	-0.443642	0.747068
276	hsa-miR-193a-5p	37.2577	36.395	36.8263	37.2174	35.573	36.3952	-0.431133	0.688049
222	hsa-miR-19a	31.1443	33.7613	32.4528	32.8788	31.2134	32.0461	-0.406744	0.817672
195	hsa-miR-720	29.5319	29.9273	29.7296	29.7597	29.1656	29.4627	-0.266955	0.532436
245	hsa-miR-627	36.0582	35.5255	35.7919	35.7788	35.3102	35.5445	-0.247354	0.557813
237	hsa-miR-372	40	40	40	39.511	40	39.7555	-0.244505	0.42265
294	hsa-miR-20b	33.3909	33.8169	33.6039	34.001	32.7699	33.3854	-0.218496	0.769202
81	hsa-miR-101	28.9921	30.8135	29.9028	30.8328	28.5722	29.7025	-0.200336	0.902868
235	hsa-miR-490-3p	35.5221	35.8577	35.6899	35.6234	35.3676	35.4955	-0.194408	0.454099
311	hsa-miR-502-5p	36.2988	38.5181	37.4084	37.3464	37.1411	37.2438	-0.16464	0.896095
18	hsa-miR-210	34.6696	34.1865	34.428	35.5586	32.9924	34.2755	-0.152523	0.917677
175	hsa-miR-211	40	36.801	38.4005	40	36.5212	38.2606	-0.139941	0.958161
356	hsa-miR-483-3p	37.5925	35.5392	36.5658	36.4455	36.4267	36.4361	-0.129728	0.911008
353	hsa-miR-589	36.4561	37.3683	36.9122	35.4217	38.1519	36.7868	-0.125398	0.938509
206	hsa-miR-32	33.0327	32.8605	32.9466	34.4216	31.2401	32.8308	-0.115788	0.948673
38	hsa-miR-26a-2*	40	40	40	40.1609	39.6207	39.8908	-0.109219	0.725114
334	hsa-miR-206	40	40	40	40	39.8329	39.9164	-0.0835656	0.42265
274	hsa-miR-200b	37.068	36.3417	36.7048	37.0596	36.2044	36.632	-0.0727746	0.908654
332	hsa-miR-377	39.3368	40	39.6684	39.2091	40	39.6045	-0.0638819	0.912805
186	hsa-miR-30e	32.4849	34.0378	33.2614	34.1905	32.2314	33.2109	-0.0504528	0.97147
39	hsa-miR-378	31.4076	31.9318	31.6697	32.8696	30.3823	31.626	-0.0437576	0.975662
6	hsa-miR-140	32.4449	31.7733	32.1091	33.5798	30.6123	32.0961	-0.0130059	0.993955
2	hsa-miR-217	40	40	40	40	40	40	0
3	hsa-miR-337-5p	40	40	40	40	40	40	0
7	hsa-miR-623	40	40	40	40	40	40	0
8	hsa-miR-520c-3p	40	40	40	40	40	40	0
9	hsa-miR-557	40	40	40	40	40	40	0
12	hsa-miR-127-5p	40	40	40	40	40	40	0
16	hsa-miR-325	40	40	40	40	40	40	0
17	hsa-miR-509-3-5p	40	40	40	40	40	40	0
22	hsa-miR-203	40	40	40	40	40	40	0
27	hsa-miR-524-3p	40	40	40	40	40	40	0
42	hsa-miR-521	40	40	40	40	40	40	0
57	hsa-miR-765	40	40	40	40	40	40	0
71	hsa-miR-518c*	40	40	40	40	40	40	0
73	hsa-miR-933	40	40	40	40	40	40	0
82	hsa-miR-30c-2*	40	40	40	40	40	40	0
89	hsa-miR-518c	40	40	40	40	40	40	0
91	hsa-miR-188-5p	40	40	40	40	40	40	0
96	hsa-miR-367	40	40	40	40	40	40	0
101	hsa-miR-887	40	40	40	40	40	40	0
107	hsa-miR-302c	40	40	40	40	40	40	0
110	hsa-miR-873	40	40	40	40	40	40	0
114	hsa-miR-129-5p	40	40	40	40	40	40	0
115	hsa-miR-492	40	40	40	40	40	40	0
116	hsa-miR-519d	40	40	40	40	40	40	0
118	hsa-miR-302d	40	40	40	40	40	40	0
125	hsa-miR-202	40	40	40	40	40	40	0
128	hsa-miR-890	40	40	40	40	40	40	0
130	hsa-miR-514	40	40	40	40	40	40	0
139	hsa-miR-506	40	40	40	40	40	40	0
150	hsa-miR-34c-5p	40	40	40	40	40	40	0
155	hsa-miR-516b	40	40	40	40	40	40	0
156	hsa-miR-302c*	40	40	40	40	40	40	0
162	hsa-miR-302b	40	40	40	40	40	40	0
169	hsa-miR-371-3p	40	40	40	40	40	40	0
172	hsa-miR-184	40	40	40	40	40	40	0
173	hsa-miR-631	40	40	40	40	40	40	0
174	hsa-miR-519a	40	40	40	40	40	40	0
176	hsa-miR-802	40	40	40	40	40	40	0
181	hsa-miR-518e	40	40	40	40	40	40	0
183	hsa-miR-658	40	40	40	40	40	40	0
197	hsa-miR-637	40	40	40	40	40	40	0
198	hsa-miR-422a	40	40	40	40	40	40	0
203	hsa-miR-129-3p	40	40	40	40	40	40	0
208	hsa-miR-488	40	40	40	40	40	40	0
209	hsa-miR-371-5p	40	40	40	40	40	40	0
210	hsa-miR-455-5p	40	40	40	40	40	40	0
211	hsa-miR-891a	40	40	40	40	40	40	0
212	hsa-miR-549	40	40	40	40	40	40	0
219	hsa-miR-608	40	40	40	40	40	40	0
223	hsa-miR-187*	40	40	40	40	40	40	0
224	hsa-miR-620	40	40	40	40	40	40	0
232	hsa-miR-548c-3p	40	40	40	40	40	40	0
246	hsa-miR-34b	40	40	40	40	40	40	0
251	hsa-miR-512-5p	40	40	40	40	40	40	0
252	hsa-miR-449a	40	40	40	40	40	40	0
253	hsa-miR-498	40	40	40	40	40	40	0
259	hsa-miR-135b	40	40	40	40	40	40	0
262	hsa-miR-34c-3p	40	40	40	40	40	40	0
263	hsa-miR-596	40	40	40	40	40	40	0
269	hsa-miR-96*	40	40	40	40	40	40	0
277	hsa-miR-449b	40	40	40	40	40	40	0
282	hsa-miR-383	40	40	40	40	40	40	0
285	hsa-miR-363*	40	40	40	40	40	40	0
288	hsa-miR-597	40	40	40	40	40	40	0
291	hsa-miR-105	40	40	40	40	40	40	0
295	hsa-miR-147	40	40	40	40	40	40	0
296	hsa-miR-198	40	40	40	40	40	40	0
298	hsa-miR-517a	40	40	40	40	40	40	0
300	hsa-miR-21*	40	40	40	40	40	40	0
301	hsa-miR-220a	40	40	40	40	40	40	0
302	hsa-miR-518f	40	40	40	40	40	40	0
304	hsa-miR-617	40	40	40	40	40	40	0
309	hsa-miR-517c	40	40	40	40	40	40	0
316	hsa-miR-373	40	40	40	40	40	40	0
328	hsa-miR-299-3p	40	40	40	40	40	40	0
333	hsa-miR-216a	40	40	40	40	40	40	0
336	hsa-miR-513a-5p	40	40	40	40	40	40	0
347	hsa-miR-216b	40	40	40	40	40	40	0
350	hsa-miR-510	40	40	40	40	40	40	0
355	hsa-miR-583	40	40	40	40	40	40	0
360	hsa-miR-193a-3p	40	40	40	40	40	40	0
362	BLANK	40	40	40	40	40	40	0
369	hsa-miR-518a-3p	40	40	40	40	40	40	0
370	hsa-miR-137	40	40	40	40	40	40	0
371	hsa-miR-508-3p	40	40	40	40	40	40	0
267	hsa-miR-516a-5p	40	40	40	40	40	40	0
140	hsa-miR-363	34.2973	34.2116	34.2544	35.618	32.9456	34.2818	0.0273057	0.985559
330	hsa-miR-338-3p	34.4713	36.12	35.2956	35.7571	34.9201	35.3386	0.0429997	0.96713
205	hsa-miR-214	36.805	35.9772	36.3911	37.1697	35.7401	36.4549	0.0637799	0.945482
337	hsa-miR-140-3p	29.3775	28.9035	29.1405	30.6667	27.7677	29.2172	0.0767362	0.963082
266	SNORD38B	32.9773	34.7022	33.8397	35.5189	32.3271	33.923	0.0832437	0.967569
188	hsa-miR-660	34.9227	35.3386	35.1306	36.5548	33.9158	35.2353	0.104677	0.944673
136	hsa-miR-491-5p	33.4095	38.0321	35.7208	36.0735	35.6226	35.8481	0.127292	0.961269
231	hsa-miR-499-5p	40	39.7452	39.8726	40	40	40	0.127386	0.42265
164	hsa-miR-30a	34.096	34.3251	34.2106	35.6379	33.0584	34.3481	0.137569	0.925083
297	hsa-miR-375	34.3089	32.4175	33.3632	34.695	32.3252	33.5101	0.146956	0.931617
182	hsa-miR-29b	34.2096	34.5301	34.3698	36.1893	32.8557	34.5225	0.152643	0.935675
148	hsa-miR-940	35.5091	34.8867	35.1979	35.4865	35.216	35.3513	0.15334	0.695623
121	hsa-miR-493	37.1451	36.618	36.8816	37.0746		37.0746	0.19304
376	hsa-miR-373*	40	35.9821	37.9911	40	36.4071	38.2035	0.212475	0.944338
141	hsa-miR-663	36.524	36.5063	36.5152	36.964	36.5481	36.7561	0.240909	0.366601
75	hsa-miR-452	34.2677	40	37.1338	36.74	38.109	37.4245	0.290632	0.930429
134	hsa-miR-545	37.0402	40.0985	38.5693	38.2569	39.4675	38.8622	0.292898	0.875053
348	hsa-miR-106b	33.362	34.3582	33.8601	35.4026	32.9237	34.1631	0.303083	0.841585
90	hsa-miR-200a	36.8885	38.6737	37.7811	40	36.1808	38.0904	0.309269	0.89681
123	hsa-miR-99a*	40	39.3619	39.681	40	40	40	0.319042	0.42265
100	hsa-miR-500	35.5772	35.8826	35.7299	36.2224	35.8764	36.0494	0.319529	0.300365
158	hsa-miR-186	30.3006	30.3346	30.3176	31.9971	29.3069	30.652	0.334422	0.826865
45	hsa-miR-132	33.3908	33.1259	33.2584	34.2111	32.9873	33.5992	0.340864	0.640718
303	hsa-miR-222	29.1222	30.1217	29.6219	30.7683	29.1714	29.9699	0.347946	0.747282
44	hsa-miR-142-5p	31.9479	34.3947	33.1713	33.5142	33.5371	33.5256	0.354348	0.799363
367	hsa-miR-429	37.3789	37.9936	37.6862	40	36.1161	38.058	0.371812	0.867459
52	hsa-miR-125b	31.3916	30.9907	31.1912	32.3326	30.8454	31.589	0.397821	0.656916
66	hsa-miR-133b	34.7164	35.9055	35.3109	37.5609	33.8767	35.7188	0.407885	0.852625
323	hsa-miR-135a	35.9845	36.1	36.0422	36.7497	36.288	36.5189	0.476614	0.183112
111	hsa-miR-323-3p	36.1609	35.6402	35.9006		36.3994	36.3994	0.498818
270	hsa-miR-362-5p	38.2449	39.1141	38.6795	40	38.3796	39.1898	0.510326	0.634646
10	hsa-miR-218	36.6077	38.6697	37.6387	40	36.307	38.1535	0.514784	0.830373
25	hsa-miR-551b	34.7939	35.4637	35.1288		35.6498	35.6498	0.521041
345	hsa-miR-450a	38.1368	37.648	37.8924	37.1737	39.7063	38.44	0.547615	0.712438
64	hsa-miR-130b	35.5854	34.9403	35.2629	37.07	34.599	35.8345	0.571648	0.698199
132	hsa-miR-150	27.4908	26.6717	27.0812	28.5695	26.7497	27.6596	0.578384	0.62076
283	hsa-miR-9	37.1819	37.8588	37.5203	38.0057	38.1984	38.1021	0.581732	0.240136
46	hsa-miR-424	31.4776	32.3412	31.9094	33.5762	31.4095	32.4929	0.583481	0.66648
244	hsa-miR-223	22.8552	22.5081	22.6816	24.1792	22.4007	23.29	0.608321	0.571127
221	hsa-miR-497	40	36.2385	38.1193	37.4716	40	38.7358	0.616564	0.811077
377	hsa-miR-149	38.7647	40	39.3824	40	40	40	0.617648	0.42265
286	hsa-miR-147b	40	38.7137	39.3568	40	40	40	0.643158	0.42265
20	hsa-miR-194	33.0691	32.2082	32.6386	35.1815	31.4057	33.2936	0.654985	0.767378
339	hsa-miR-122	29.073	26.5961	27.8345	30.0144	26.9815	28.4979	0.663403	0.767007
365	hsa-miR-629	34.5387	35.6327	35.0857	36.6198	34.8834	35.7516	0.665942	0.582926
85	hsa-miR-196a	38.6309	40	39.3155	40	40	40	0.684545	0.42265
265	hsa-miR-145	29.8959	30.1145	30.0052	31.075	30.3081	30.6916	0.686404	0.227296
166	hsa-miR-484	28.5309	28.6938	28.6124	30.1472	28.4713	29.3093	0.696904	0.494842
49	hsa-miR-532-5p	33.0399	32.3047	32.6723	35.2597	31.4907	33.3752	0.702906	0.749396
318	hsa-miR-9*	40	38.5632	39.2816	40	40	40	0.718386	0.42265
230	hsa-miR-181c	36.8649	40	38.4325	38.3116	40	39.1558	0.723351	0.723882
256	hsa-miR-598	33.3476	32.811	33.0793	34.4499	33.1562	33.8031	0.723722	0.409988
127	hsa-miR-503	36.0109	38.5594	37.2851	40	36.0246	38.0123	0.727157	0.787216
61	hsa-miR-590-5p	30.1982	31.02	30.6091	32.5581	30.2166	31.3873	0.778224	0.594576
357	hsa-miR-582-5p	35.5123	36.1971	35.8547	38.365	34.911	36.638	0.783261	0.699921
344	hsa-miR-425*	32.3636	33.3806	32.8721	34.6441	32.6733	33.6587	0.786558	0.551654
372	hsa-miR-539	39.6947	38.7223	39.2085	40	40	40	0.791528	0.245072
381	hsa-miR-100	37.0563	38.4016	37.729	40	37.0424	38.5212	0.792243	0.67401
287	hsa-miR-197	29.1549	29.6163	29.3856	30.0267	30.3537	30.1902	0.804622	0.104505
167	hsa-miR-337-3p	35.4966	36.5925	36.0446	37.4267	36.2782	36.8525	0.807894	0.415844
308	hsa-miR-95	35.1657	35.288	35.2269	36.6884	35.4269	36.0577	0.830793	0.320164
234	hsa-miR-93	26.9862	28.0583	27.5223	29.2821	27.4596	28.3708	0.84857	0.506399
13	hsa-miR-140-5p	31.7984	33.3957	32.5971	34.4998	32.4223	33.461	0.863983	0.577429
281	hsa-miR-18a*	33.4656	33.5285	33.497	35.4016	33.3224	34.362	0.865009	0.493076
378	hsa-miR-642	38.4728	37.3855	37.9291	37.5936	40	38.7968	0.867669	0.578587
151	hsa-miR-885-5p	36.0349	34.4728	35.2538	38.0689	34.1766	36.1228	0.868936	0.718822
53	hsa-miR-185	27.5871	28.0645	27.8258	30.0956	27.2955	28.6956	0.869779	0.602612
327	hsa-miR-1	33.2762	32.8142	33.0452	35.7757	32.0817	33.9287	0.883517	0.681817
29	hsa-miR-486-5p	26.4267	25.0274	25.727	28.2862	24.9402	26.6132	0.886168	0.673405
28	hsa-miR-7	33.1761	34.2507	33.7134	35.6396	33.587	34.6133	0.899918	0.518552
76	hsa-miR-215	32.9816	30.993	31.9873	34.8465	30.9329	32.8897	0.902415	0.72084
99	hsa-miR-92a	25.3005	24.8301	25.0653	27.0815	24.8544	25.968	0.902674	0.510852
236	hsa-miR-29c	31.136	32.5186	31.8273	33.6056	31.8654	32.7355	0.908154	0.499676
305	hsa-miR-154	34.3767	33.6449	34.0108	35.3406	34.5162	34.9284	0.917576	0.237868
329	hsa-miR-142-3p	26.2004	29.3704	27.7854	28.8952	28.5176	28.7064	0.921016	0.622234
145	hsa-miR-154*	38.1211	40	39.0606	40	40	40	0.939435	0.42265
54	hsa-miR-25	28.5771	27.2129	27.895	30.6026	27.0698	28.8362	0.941208	0.668404
272	hsa-miR-550	36.2034	38.2637	37.2335	40	36.3496	38.1748	0.941254	0.697333
200	hsa-miR-335	31.9479	32.3866	32.1672	33.1416	33.0765	33.109	0.941797	0.0512162
341	hsa-miR-182	33.4015	32.6141	33.0078	34.3506	33.5705	33.9605	0.952721	0.227748
226	hsa-miR-501-5p	35.1486	34.4679	34.8082		35.7637	35.7637	0.955473
241	hsa-miR-302a	40	38.0759	39.038	40	40	40	0.962049	0.42265
194	hsa-miR-526b	36.1977	37.8382	37.0179	36.3385	39.639	37.9888	0.970858	0.650915
261	hsa-miR-299-5p	35.621	35.591	35.606		36.5774	36.5774	0.971437
140	hsa-miR-342-3p	27.5645	28.265	27.9147	29.3667	28.4057	28.8862	0.971462	0.243909
279	hsa-miR-192	31.6316	29.3183	30.4749	33.4507	29.4891	31.4699	0.994971	0.70676
326	hsa-miR-301a	30.9051	33.3657	32.1354	33.3569	32.91	33.1334	0.998037	0.508481
131	hsa-miR-16	23.5033	22.0948	22.7991	25.6395	22.0004	23.8199	1.02089	0.653007
248	hsa-miR-17	30.252	31.1659	30.7089	32.405	31.062	31.7335	1.02457	0.334357
207	hsa-miR-324-3p	32.4569	32.0728	32.2648	34.2614	32.3207	33.291	1.02624	0.408491
321	hsa-miR-195	32.0613	31.9567	32.009	34.005	32.07	33.0375	1.02849	0.399701
280	hsa-miR-29a	31.4088	31.9988	31.7038	33.9712	31.4973	32.7343	1.03045	0.50284
102	hsa-miR-491-3p	39.7835	38.1487	38.9661	40	40	40	1.03389	0.333368
306	hsa-miR-708	40	37.9166	38.9583	40	40	40	1.0417	0.42265
322	hsa-miR-183	37.7275	36.2197	36.9736	40	36.0597	38.0298	1.05623	0.666245
80	hsa-miR-33a	36.0519	35.0853	35.5686		36.6315	36.6315	1.06293
56	hsa-miR-20a	25.4899	26.1596	25.8248	28.0246	25.7581	26.8914	1.0666	0.461995
94	hsa-miR-401	36.5975	36.3769	36.4872	37.5626		37.5626	1.07543
214	hsa-miR-518b	37.8244	40	38.9122	40	40	40	1.0878	0.42265
380	hsa-miR-451	23.4527	23.2483	23.3505	26.5202	22.3698	24.445	1.09453	0.650932
340	hsa-miR-106a	26.1209	27.4638	26.7924	28.6422	27.1762	27.9092	1.11681	0.377969
126	hsa-miR-10b	33.5355	33.4254	33.4805	34.9891	34.326	34.6576	1.1771	0.072746
320	hsa-miR-628-3p	32.7676	33.4	33.0838	34.1276	34.3949	34.2612	1.1774	0.0755182
152	hsa-miR-320a	26.4871	25.889	26.1881	28.535	26.2112	27.3731	1.18506	0.427409
129	hsa-miR-30d	29.9726	29.5251	29.7488	31.5966	30.2736	30.9351	1.18625	0.231467
36	hsa-miR-130a	32.2666	32.295	32.2808	34.6838	32.3075	33.4956	1.21482	0.414132
373	hsa-miR-148a	30.2638	31.0597	30.6617	32.5963	31.161	31.8786	1.21691	0.276317
192	hsa-miR-219-5p	35.6137	38.9693	37.2915	39.6967	37.3523	38.5245	1.23298	0.608102
191	hsa-miR-324-5p	32.0423	32.5217	32.282	34.6808	32.3605	33.5207	1.23864	0.405504
247	hsa-miR-410	37.4539	35.4214	36.4376	37.2631	38.1306	37.6969	1.25925	0.372531
122	hsa-miR-423-5p	29.9	30.1391	30.0196	31.639	30.9262	31.2826	1.26304	0.0783349
137	hsa-miR-92b	34.6118	33.2945	33.9531	35.4155	35.0424	35.229	1.27581	0.203388
146	hsa-miR-27a	26.0207	27.4451	26.7329	28.545	27.4813	28.0132	1.28021	0.286466
5	hsa-miR-374b*	40	37.4242	38.7121	40	40	40	1.2879	0.42265
84	hsa-miR-340	34.5272	36.4974	35.5123	37.2311	36.3798	36.8055	1.29312	0.351434
11	hsa-miR-136	37.4079	40	38.7039	40	40	40	1.29607	0.42265
86	hsa-miR-888	36.1817	36.2408	36.2112	38.3901	36.6323	37.5112	1.29994	0.277416
153	hsa-miR-18b	29.5091	30.6363	30.0727	31.746	31.0454	31.3957	1.32295	0.184385
180	hsa-miR-744	34.0317	35.5216	34.7767	35.7947	36.4059	36.1003	1.32361	0.241932
15	hsa-miR-20b*	34.9931	36.0029	35.498	36.6748	36.97	36.8224	1.32442	0.128138
361	hsa-miR-153	35.4763	38.3813	36.9288	37.2269	39.3151	38.271	1.34221	0.531315
225	hsa-let-7i	29.5604	30.095	29.8277	32.5113	29.8287	31.17	1.34229	0.429854
217	hsa-miR-15a	27.067	26.8406	26.9538	30.1201	26.4805	28.3003	1.34651	0.537118
364	hsa-miR-22	33.3847	33.1538	33.2693	36.5296	32.7381	34.6338	1.36457	0.547062
289	hsa-miR-326	34.6249	34.0281	34.3265	35.7897	35.6076	35.6987	1.37212	0.048007
179	hsa-miR-34a	37.9738	34.8886	36.4312	40	35.607	37.8035	1.37227	0.660017
133	hsa-miR-654-5p	36.2502	34.6476	35.4489		36.8214	36.8214	1.37252
352	hsa-miR-525-5p	37.596	38.167	37.8815	38.7604	39.7488	39.2546	1.37307	0.13791
290	hsa-miR-15b	26.9021	26.9222	26.9122	29.1696	27.4059	28.2877	1.37558	0.259176
83	hsa-miR-331-3p	30.646	33.4283	32.0372	32.4047	34.4218	33.4132	1.37604	0.50725
58	hsa-miR-24	25.1898	26.1098	25.6498	27.3946	26.6644	27.0295	1.37976	0.143247
307	hsa-let-7b	26.8739	26.3674	26.6206	28.7584	27.2513	28.0048	1.38419	0.223761
50	hsa-miR-99a	33.2059	32.2243	32.7151	35.6369	32.573	34.105	1.38991	0.478651
331	hsa-miR-584	32.1885	32.5477	32.3681	34.3654	33.192	33.7787	1.41061	0.148251
23	hsa-miR-181a*	36.3512	34.8379	35.5946	37.5475	36.4657	37.0066	1.41202	0.268285
268	hsa-miR-421	32.6351	32.3383	32.4867	35.0417	32.8067	33.9242	1.43752	0.33035
51	hsa-miR-92a-1*	40	37.1054	38.5527	40	40	40	1.4473	0.42265
382	hsa-miR-27b	26.9351	28.2487	27.5919	29.4455	28.665	29.0552	1.46338	0.195515
325	hsa-miR-146b-5p	32.2426	33.6184	32.9305	34.7505	34.0405	34.3955	1.46497	0.198966
124	hsa-miR-10a	34.0245	34.2229	34.1237	36.5095	34.6826	35.5961	1.47235	0.250225
144	hsa-miR-402	35.2224	34.012	34.6172	37.0304	35.1772	36.1038	1.48663	0.311316
48	hsa-miR-374a	31.1057	31.5377	31.3217	32.932	32.7033	32.8177	1.49595	0.0256747
98	hsa-miR-18a	30.6646	32.5403	31.6024	33.2588	32.9885	33.1237	1.52128	0.249603
317	hsa-miR-200c	33.3719	33.6745	33.5232	35.7078	34.396	35.0519	1.52863	0.151146
60	hsa-miR-425	29.1215	29.9155	29.5185	31.7209	30.3897	31.0553	1.53681	0.185838
228	hsa-miR-1979	26.0414	26.9909	26.5161	28.0977	28.0168	28.0573	1.54114	0.0837422
161	hsa-miR-107	28.8796	30.2849	29.5822	31.2819	30.9837	31.1328	1.5506	0.16352
196	hsa-miR-30b	27.9054	29.3469	28.6261	30.2991	30.0614	30.1802	1.55409	0.167209
168	hsa-miR-494	37.9472	38.2795	38.1134	40	39.3415	39.6708	1.5574	0.0517617
106	hsa-miR-376b	37.6	39.2802	38.4401	40	40	40	1.55987	0.204473
97	hsa-miR-505	32.6073	32.0159	32.3116	35.1104	32.6503	33.8803	1.5687	0.340734
68	hsa-miR-23a	25.5093	26.2756	25.8924	27.9054	27.0429	27.4741	1.5817	0.111255
264	hsa-miR-126*	27.4054	27.4407	27.4231	29.3829	28.6517	29.0173	1.5942	0.0488878
67	hsa-miR-542-5p	40	36.7999	38.3999	40	40	40	1.60005	0.42265
227	hsa-miR-652	31.7586	32.3181	32.0383	34.631	32.6954	33.6632	1.62489	0.248099
338	hsa-miR-181a	30.0753	29.8885	29.9819	32.1692	31.0541	31.6116	1.6297	0.102211
4	hsa-miR-328	31.1043	31.9234	31.5139	33.2789	33.0521	33.1655	1.65162	0.0602895
113	hsa-miR-125a-5p	28.8747	28.7765	28.8256	30.6029	30.4092	30.506	1.6804	0.00414971
319	hsa-miR-181b	34.1846	35.0959	34.6403	37.1929	35.4493	36.3211	1.68089	0.229619
201	hsa-miR-134	32.4512	32.3586	32.4049	33.7867	34.3863	34.0865	1.68161	0.0310343
40	hsa-miR-221	29.2915	30.5305	29.911	31.5516	31.651	31.6013	1.69035	0.11277
79	hsa-miR-668	40	36.5684	38.2842	40	40	40	1.71581	0.42265
147	hsa-miR-376c	33.2707	33.2012	33.236	35.8959	34.028	34.9619	1.72597	0.206053
379	hsa-miR-31	36.7526	36.2978	36.5252	40	36.5222	38.2611	1.73588	0.426577
218	hsa-miR-191	27.5005	28.3635	27.932	29.4264	29.9409	29.6837	1.75163	0.0733218
229	hsa-miR-30e*	31.6426	31.2982	31.4704	33.484	32.9675	33.2258	1.7554	0.029874
202	hsa-miR-21	25.2386	25.3607	25.2997	27.886	26.2289	27.0574	1.75779	0.168618
142	hsa-miR-651	36.0896	36.2407	36.1651	40	35.8772	37.9386	1.77348	0.480524
240	hsa-miR-190	34.1848	33.9403	34.0626	36.1479	35.5412	35.8445	1.78196	0.0320727
342	hsa-miR-370	35.7617	34.0823	34.922	36.8073	36.6029	36.7051	1.78308	0.169587
87	hsa-miR-330-3p	33.5449	35.5975	34.5712	36.814	35.8976	36.3558	1.78461	0.253244
299	hsa-miR-361-3p	36.9097	34.5074	35.7086	39.2727	35.7159	37.4943	1.78574	0.49288
154	hsa-miR-187	34.9139	40	37.4569	40	38.5163	39.2582	1.80122	0.566686
260	hsa-miR-495	32.7547	31.4958	32.1253		33.9297	33.9297	1.80438
375	hsa-miR-139-5p	30.1861	30.039	30.1125	32.4006	31.6444	32.0225	1.90993	0.0383438
249	hsa-miR-376a	33.3789	32.8574	33.1182	36.1951	33.8702	35.0326	1.91449	0.249309
170	hsa-miR-103	27.3354	28.6262	27.9808	30.0135	29.795	29.9042	1.9234	0.0989402
103	hsa-miR-423-3p	29.0629	29.5481	29.3055	31.2825	31.2098	31.2461	1.94064	0.0155987
233	hsa-miR-152	30.3503	30.6136	30.482	32.9846	31.8697	32.4272	1.9452	0.076847
63	hsa-miR-574-3p	29.9792	29.5812	29.7802	31.7195	31.7916	31.7556	1.97538	0.0103237
37	hsa-miR-138	38.047	37.9968	38.0219	40	40	40	1.97809	0.000161338
30	hsa-miR-30c	26.774	27.3183	27.0462	29.4091	28.6691	29.0391	1.9929	0.0492292
220	hsa-miR-576-5p	36.1385	35.5771	35.8578	40	35.7271	37.8636	2.00576	0.450205
21	hsa-let-7g	27.0948	26.9636	27.0292	29.7898	28.4132	29.1015	2.07229	0.0956199
95	hsa-miR-23b	26.5095	27.2404	26.8749	29.1254	28.7861	28.9558	2.08084	0.0355047
72	hsa-miR-204	34.6887	33.6888	34.1887	37.0673	35.478	36.2726	2.08386	0.156639
250	hsa-miR-877	34.8755	34.9214	34.8985	38.0989	35.9551	37.027	2.12856	0.185509
33	hsa-miR-329	34.8689	33.974	34.4215	36.55	36.5746	36.5623	2.14083	0.0410468
32	hsa-miR-128	32.37	32.7045	32.5372	35.1724	34.2079	34.6902	2.15293	0.0518746
178	hsa-miR-625*	33.3519	32.9565	33.1542	35.6098	35.0058	35.3078	2.15359	0.0269636
189	hsa-let-7c	30.4253	31.4153	30.9203	33.4128	32.7505	33.0816	2.16138	0.0682496
109	hsa-miR-339-5p	30.1283	33.0591	31.5937	33.0063	34.5489	33.7776	2.18389	0.317997
292	hsa-miR-196b	34.0379	33.5191	33.7785	37.7288	34.2296	35.9792	2.20072	0.339445
239	hsa-miR-124	38.3503	37.2447	37.7975	40	40	40	2.20249	0.0576018
149	hsa-miR-22*	33.3453	33.5832	33.4643	35.7267	35.6555	35.6911	2.22685	0.00309416
215	hsa-miR-361-5p	38.3805	37.1234	37.752	40.0166	39.9565	39.9865	2.23458	0.0709677
120	hsa-miR-151-3p	29.2079	29.2693	29.2386	31.703	31.2526	31.4778	2.23919	0.0101491
204	hsa-miR-26b	28.4071	27.9472	28.1772	31.0039	29.8324	30.4181	2.24097	0.0706112
216	hsa-miR-454	33.214	32.7731	32.9936	35.8926	34.5909	35.2417	2.2482	0.0820912
104	hsa-miR-126	24.3197	24.1156	24.2176	27.0076	25.9357	26.4716	2.25399	0.0538914
254	hsa-miR-148b	29.0125	30.819	29.9158	32.4171	31.9767	32.1969	2.28119	0.13361
159	hsa-miR-199a-5p	33.0572	36.7804	34.9188	34.4266	40	37.2133	2.29451	0.564253
31	hsa-miR-301b	35.3927	40	37.6964	40	40	40	2.30364	0.42265
187	hsa-miR-403	38.0119	37.3223	37.6671	40	40	40	2.33294	0.0211531
160	hsa-miR-155	31.5931	31.4129	31.503	34.5939	33.0833	33.8386	2.33556	0.0917162
185	hsa-let-7a	28.0774	28.5246	28.301	30.9274	30.3641	30.6457	2.34476	0.0227278
135	hsa-miR-29b-2*	35.0263	35.7058	35.3661		35.494	35.494	0.127915	0.0211531
93	hsa-miR-99b	30.0468	30.0931	30.0699	32.4002	32.514	32.4571	2.38714	0.000661837
65	hsa-let-7e	30.0655	30.3764	30.2209	32.3813	32.9664	32.6739	2.45292	0.0177534
92	hsa-miR-26a	25.108	25.2213	25.1647	27.8562	27.4074	27.6318	2.46717	0.00868469
255	hsa-miR-127-3p	32.8192	34.4031	33.6112	35.8021	36.4037	36.1029	2.49172	0.098759
273	hsa-miR-766	30.0852	30.5561	30.3206	32.5052	33.1409	32.823	2.5024	0.0240855
374	hsa-miR-146a	29.3914	29.755	29.5732	32.4632	31.7161	32.0897	2.51645	0.0261872
35	hsa-miR-487b	35.737	34.6757	35.2063	38.4201	37.0405	37.7303	2.52402	0.101167
199	hsa-miR-199a-3p	29.2993	30.4675	29.8834	32.3788	32.4617	32.4202	2.53682	0.0240855
78	hsa-miR-374b	29.3952	29.3784	29.3868	32.1641	31.816	31.9901	2.60327	0.00445091
112	hsa-miR-181d	34.3968	34.7399	34.5683	36.0486	38.413	37.2308	2.66245	0.155629
293	hsa-miR-296-5p	37.2058	37.3639	37.2848	40	40	40	2.71516	0.000846089
190	hsa-miR-28-5p	30.4474	31.5238	30.9856	34.7256	33.0551	33.8903	2.90474	0.0998046
310	hsa-miR-151-5p	27.5168	28.3214	27.9191	30.5885	31.0655	30.827	2.90787	0.0249052
258	hsa-let-7d	30.449	30.2609	30.3549	34.3427	32.4612	33.402	3.047	0.0842767
177	hsa-let-7f	27.2678	27.1961	27.2319	30.5749	30.0389	30.3069	3.07499	0.00764314
368	hsa-miR-98	33.7408	34.0255	33.8831	36.8401	37.2452	37.0426	3.15951	0.00608402
34	hsa-miR-224	35.4618	36.419	35.9404	39.1336	39.6193	39.3764	3.436	0.023536
363	hsa-miR-409-3p	31.3906	30.109	30.7498	35.7711	32.7128	34.2419	3.49215	0.169779
346	hsa-miR-411	33.1716	32.9362	33.0539		36.5769	36.5769	3.52304
315	hsa-miR-382	32.5059	31.6501	32.078	36.3268	35.5804	35.9536	3.87556	0.0207965
1	hsa-miR-379	35.9249	33.7649	34.8449	40	39.3115	39.6557	4.81084	0.051284
