# Supplementary material for: Plasma Processing Conditions Substantially Influence Circulating microRNA Biomarker Levels
Source: PLoS One. 2013 Jun 7;8(6):e64795. doi: 10.1371/journal.pone.0064795 (PMC3676411; doi:10.1371/journal.pone.0064795)
Supplement: Table S3 — qRT-PCR Array Data of 7 Plasma and Serum Sample Types. (XLSX) [file pone.0064795.s005.xlsx]

## Sheet: Sheet1
Target Name	PlateletCONC_1-2	PlateletCONC_2-2	PlasmaRICH_1-2	PlasmaRICH_2-2	PlasmaSTD_1-2	PlasmaSTD_2-2	PlasmaPOOR_1-2	PlasmaPOOR_2-2	PlasmaFILT_1-2	PlasmaFILT_2-2	SerumSTD_1-2	SerumSTD_2-2	SerumFILT_1-2	SerumFILT_2-2	NTC
hsa-let-7a	22.8756	22.5125	22.463	23.1033	28.0774	28.5246	31.1881	29.294	34.3662	31.7845	30.9274	30.3644	33.3092	31.4423	NA
hsa-let-7b	22.4606	23.0282	23.2704	23.4051	26.8739	26.3674	28.6582	26.3242	29.8086	26.4133	28.7584	27.2513	30.0213	26.4144	NA
hsa-let-7c	25.7737	25.2863	25.4165	26.0339	30.4253	31.4153	33.106	31.7324	35.4497	33.058	33.4128	32.7505	35.719	33.3459	NA
hsa-let-7d	24.3438	24.1112	24.6195	24.7317	30.449	30.2609	33.0489	31.5783	38.1234	32.8994	34.3427	32.4612	37.3722	33.2376	NA
hsa-let-7d*	24.2103	24.4268	24.877	24.8184	29.4022	29.5084	31.3475	30.4277	32.921	30.8928	31.4294	30.3274	32.5616	30.7829	28.1476
hsa-let-7e	23.9557	25.0351	25.0655	25.5077	30.0655	30.3764	33.2592	32.1914	35.502	34.2013	32.3813	32.9664	NA	35.3221	NA
hsa-let-7f	19.9781	21.2594	21.8091	22.0172	27.2678	27.1961	31.092	29.498	34.493	31.9468	30.5749	30.0389	33.6125	31.9849	NA
hsa-let-7g	20.4974	22.029	22.1325	22.6318	27.0948	26.9636	29.3405	27.1237	31.2569	28.0382	29.7898	28.4132	31.5686	28.3326	NA
hsa-let-7i	24.5616	25.1512	24.4145	25.7343	29.5604	30.095	31.1485	29.357	32.4509	29.5956	32.5113	29.8287	33.2963	29.5034	NA
hsa-miR-1	26.9782	26.3766	27.5408	27.1208	33.2762	32.8142	37.0056	34.2292	NA	34.3397	35.7757	32.0817	36.9469	31.9715	36.8831
hsa-miR-100	NA	33.2875	32.8695	34.1642	37.0563	38.4316	38.5328	36.5349	38.9428	35.9498	NA	37.0424	36.0996	36.3748	NA
hsa-miR-101	21.6215	24.2534	22.7588	25.1937	28.9921	30.8135	28.71	27.9168	29.5639	28.297	30.8328	28.5722	31.1625	28.0618	NA
hsa-miR-103	21.4126	22.3688	20.279	22.9355	27.3354	28.6262	29.0561	28.0757	32.1435	29.7297	30.0135	29.795	32.5898	29.494	NA
hsa-miR-105	NA	NA	NA	NA	NA	NA	NA	NA	NA	NA	NA	NA	NA	NA	NA
hsa-miR-106a	NA	22.0602	20.893	22.441	26.1209	27.4638	27.6291	26.1137	28.7212	26.4198	28.6422	27.1762	29.6348	26.3251	NA
hsa-miR-106b	36.5905	29.0234	27.5406	30.0574	33.362	34.3582	33.984	32.6827	35.4725	32.4554	35.4026	32.9237	35.9612	32.1392	NA
hsa-miR-107	22.0216	23.7618	21.2575	24.2285	28.8796	30.2849	30.2654	28.8729	33.0113	30.7517	31.2819	30.9837	33.3858	30.5258	NA
hsa-miR-10a	27.8928	29.0198	29.4914	29.7033	34.0245	34.2229	36.6252	34.2539	35.5639	35.4133	36.5095	34.6826	35.1158	34.4558	NA
hsa-miR-10b	32.5388	33.3466	32.9952	32.6047	33.5355	33.4254	34.3195	33.5339	34.6112	34.0448	34.9891	34.326	33.7339	33.8036	NA
hsa-miR-122	29.3039	26.7989	28.5736	26.2736	29.073	26.5961	29.0891	26.2536	29.5884	26.042	30.0144	26.9815	29.962	26.3776	NA
hsa-miR-124	NA	NA	37.1008	36.625	38.3503	37.2447	36.4004	37.0576	NA	35.3049	NA	NA	NA	NA	NA
hsa-miR-125a-5p	22.1353	23.4232	24.0863	24.0178	28.8747	28.7765	31.2688	30.1631	34.195	31.477	30.6029	30.4092	32.2343	30.5109	NA
hsa-miR-125b	25.0377	27.3652	26.6743	27.8765	31.3916	30.9907	31.9044	29.7066	32.5771	29.9596	32.3326	30.8454	32.5402	29.9494	NA
hsa-miR-126	17.08	18.3752	19.3434	19.0852	24.3197	24.1156	26.7706	25.3765	28.5523	26.1205	27.0076	25.9357	28.4941	26.3316	NA
hsa-miR-126*	19.938	21.1718	22.2079	21.7723	27.4054	27.4407	29.3248	28.9781	30.8605	28.4984	29.3829	28.6517	30.5197	28.616	NA
hsa-miR-127-3p	26.3824	27.2644	27.478	27.8629	32.8192	34.4331	36.3807	33.5155	NA	35.2461	35.8021	36.4037	NA	35.5295	39.5126
hsa-miR-127-5p	35.0017	34.0413	34.0434	35.3383	NA	NA	NA	NA	NA	NA	NA	NA	NA	NA	NA
hsa-miR-128	27.2396	27.3844	28.2951	28.4198	32.37	32.7045	35.1214	34.5869	35.4487	35.2887	35.1724	34.2079	37.1846	34.5271	NA
hsa-miR-129-3p	37.4736	NA	35.4042	NA	NA	NA	NA	NA	NA	NA	NA	NA	NA	39.5613	NA
hsa-miR-129-5p	NA	38.0173	NA	36.9872	NA	NA	NA	NA	NA	NA	NA	NA	NA	NA	NA
hsa-miR-130a	25.9247	27.3209	25.4705	27.9908	32.2666	32.295	33.5537	32.2022	34.8168	31.9771	34.6838	32.3075	35.5827	32.3989	NA
hsa-miR-130b	29.4993	30.1579	29.3114	30.8983	35.5854	34.9433	36.3198	34.3143	38.0707	35.2532	37.07	34.599	39.1752	34.8814	NA
hsa-miR-132	26.9499	28.371	29.092	28.7477	33.3908	33.1259	34.2342	33.2868	35.2339	32.6438	34.2111	32.9873	34.7115	33.2556	NA
hsa-miR-133a	30.3627	32.1453	30.2447	32.7418	38.9024	39.4613	37.4597	36.0914	NA	38.1713	NA	35.9033	NA	35.6358	NA
hsa-miR-133b	28.7345	30.1883	28.8913	30.9633	34.7164	35.9055	35.6176	34.865	NA	37.0727	37.5609	33.8767	NA	32.9709	NA
hsa-miR-134	26.7545	26.8294	28.576	27.1708	32.4512	32.3586	34.9553	33.8263	37.1444	34.3143	33.7867	34.3863	35.5568	34.171	35.97
hsa-miR-135a	30.2116	30.8799	31.7768	31.6658	35.9845	36.1	35.5626	35.5887	39.0773	36.6327	36.7497	36.288	37.6103	36.4237	NA
hsa-miR-135b	38.0922	38.1996	NA	39.7238	NA	NA	NA	NA	NA	NA	NA	NA	NA	NA	NA
hsa-miR-136	NA	32.4387	29.4164	33.4003	37.4079	NA	35.3838	36.1428	38.0475	NA	NA	NA	NA	NA	NA
hsa-miR-137	NA	38.121	37.2744	NA	NA	NA	NA	NA	NA	NA	NA	NA	NA	39.7922	NA
hsa-miR-138	35.7925	35.0477	35.2234	36.0152	38.047	37.9968	NA	35.7977	NA	NA	NA	NA	39.7964	NA	NA
hsa-miR-139-5p	NA	24.052	25.4908	24.5218	30.1861	30.039	32.5752	30.8724	33.5329	32.3592	32.4306	31.6444	34.2795	32.3973	NA
hsa-miR-140-3p	24.6028	25.4968	25.292	25.8171	29.3775	28.9035	29.6765	28.1407	30.3359	27.9973	30.6667	27.7677	30.623	28.0103	38.4276
hsa-miR-140-5p	NA	27.4348	26.1888	27.8906	31.7984	33.3957	33.2422	32.342	35.2999	32.9505	34.4998	32.4223	33.2187	31.5475	NA
hsa-miR-141	28.3939	30.4601	29.7871	31.0856	35.6235	NA	36.0568	35.2588	37.2949	35.9379	37.3141	34.5152	NA	35.1936	NA
hsa-miR-142-3p	18.2585	21.6209	19.0076	22.6616	26.2004	29.3704	27.9542	27.1088	31.3299	30.1801	28.8952	28.5176	31.7233	29.5744	NA
hsa-miR-142-5p	26.4292	28.1518	25.089	28.933	31.9479	34.3947	32.8501	33.2955	35.2662	34.4289	33.5142	33.5371	34.7296	32.5481	NA
hsa-miR-143	26.1325	27.9008	26.9529	28.5824	32.4449	31.7733	33.437	31.3502	33.5212	31.5471	33.5798	30.6123	32.5357	31.0482	NA
hsa-miR-144	27.5731	29.2569	27.2558	30.0463	29.7287	32.479	28.8829	28.2601	29.2706	28.8059	31.914	29.2142	31.9296	28.4191	NA
hsa-miR-145	22.9706	24.3827	24.3984	25.0119	29.8959	30.1145	31.4602	29.4556	31.948	30.065	31.075	30.3081	31.8238	29.7383	NA
hsa-miR-146a	NA	23.4991	23.5331	24.1417	29.3914	29.755	32.2904	31.382	34.3984	32.4914	32.4632	31.7161	33.3316	32.0936	NA
hsa-miR-146b-5p	28.2136	27.2759	28.1883	27.7458	32.2426	33.6184	35.7119	34.3369	37.6109	34.9306	34.7505	34.0405	36.8301	34.8254	NA
hsa-miR-147	NA	NA	38.7951	NA	NA	NA	NA	NA	NA	NA	NA	NA	NA	NA	NA
hsa-miR-147b	NA	37.1154	37.0807	NA	NA	38.7137	NA	NA	NA	NA	NA	NA	NA	NA	NA
hsa-miR-148a	NA	25.4779	25.5326	26.5715	30.2638	31.0597	32.0056	31.3274	32.7906	31.9113	32.5963	31.161	32.5529	31.2038	NA
hsa-miR-148b	22.693	24.8293	24.2615	25.4397	29.0125	30.819	31.6508	31.7064	33.0144	32.8419	32.4171	31.9767	33.2977	32.2584	NA
hsa-miR-149	NA	35.1374	33.488	35.4948	38.7647	NA	NA	NA	NA	NA	NA	NA	35.6618	35.5861	NA
hsa-miR-150	24.6104	25.161	26.1225	25.1267	27.4908	26.6717	27.9743	27.0136	29.9343	27.7097	28.5695	26.7497	30.3716	27.7943	NA
hsa-miR-151-3p	22.103	23.4523	24.2008	23.6421	29.2079	29.2693	32.0598	30.955	34.4068	31.5806	31.703	31.2526	34.3622	31.5495	NA
hsa-miR-151-5p	23.9111	22.4916	22.0111	22.9985	27.5168	28.3214	30.7409	29.6782	33.1385	31.2498	30.5885	31.0655	33.3091	31.646	NA
hsa-miR-152	NA	25.2835	25.6653	25.6143	30.3503	30.6136	33.2283	31.7995	33.8746	32.7428	32.9846	31.8697	33.8201	32.4764	NA
hsa-miR-153	NA	31.7914	32.1367	32.2872	35.4763	38.3813	36.8937	NA	37.2735	NA	37.2269	39.3151	39.2058	NA	NA
hsa-miR-154	26.3592	27.3962	28.1674	28.0237	34.3767	33.6449	36.768	33.0865	37.1394	35.4498	35.3406	34.5162	NA	34.6754	NA
hsa-miR-154*	34.8251	33.097	34.6016	34.8262	38.1211	NA	NA	37.4252	NA	NA	NA	NA	NA	NA	NA
hsa-miR-155	25.6199	26.4337	27.0991	26.974	31.5931	31.4129	32.6929	32.1867	36.3815	33.5176	34.5939	33.0833	NA	34.6173	NA
hsa-miR-15a	21.7002	23.2436	22.3492	23.5945	27.067	26.8406	27.5484	26.4176	28.4373	26.6405	30.1201	26.4805	30.0474	26.5222	NA
hsa-miR-15b	19.9273	21.2071	21.6666	21.7303	26.9021	26.9222	29.5819	27.9707	31.4628	28.6196	29.1696	27.4059	30.3278	27.8032	NA
hsa-miR-16	18.5421	19.0041	20.0653	19.134	23.5033	22.0948	24.2297	22.1655	24.932	22.0254	25.6395	22.0004	25.6567	21.874	36.1387
hsa-miR-17	23.5076	25.7993	24.886	26.0069	30.252	31.1659	31.5066	30.0879	32.4292	30.3807	32.435	31.062	33.1983	30.4437	NA
hsa-miR-181a	26.0824	24.4928	24.0424	24.9072	30.0753	29.8885	31.7566	30.2208	34.075	31.8506	32.1692	31.0541	34.5005	30.936	NA
hsa-miR-181a*	29.1882	29.563	30.635	30.562	36.3512	34.8379	NA	37.2902	NA	38.8491	37.5475	36.4657	38.3867	NA	NA
hsa-miR-181b	28.7431	29.5028	29.3144	30.1448	34.1846	35.0959	35.5137	35.5153	38.7432	35.7532	37.1929	35.4493	38.3498	35.5826	NA
hsa-miR-181c	31.9549	33.019	31.5931	33.4645	36.8649	NA	38.1639	36.5986	37.32	38.0364	38.3116	NA	39.4852	NA	NA
hsa-miR-181d	27.6766	30.063	28.4674	30.1474	34.3968	34.7399	37.2382	35.6708	NA	NA	36.0486	38.413	NA	37.5187	NA
hsa-miR-182	27.8485	27.8817	28.9402	28.497	33.4315	32.6141	35.6579	32.9907	36.5108	36.2047	34.3506	33.5705	35.3586	34.2295	NA
hsa-miR-183	NA	35.1931	35.4703	35.7194	37.7275	36.2197	37.5611	35.6129	39.5702	35.7358	NA	36.0597	38.6815	36.1271	38.287
hsa-miR-184	NA	39.1905	NA	NA	NA	NA	NA	NA	NA	NA	NA	NA	NA	NA	NA
hsa-miR-185	21.3828	23.1969	22.7315	23.6097	27.5871	28.0645	28.8189	26.2552	29.6227	26.6851	30.0956	27.2955	30.8529	26.4982	NA
hsa-miR-185*	34.4991	33.1566	33.4717	34.45	NA	NA	NA	NA	38.0536	NA	35.7268	NA	NA	37.8403	NA
hsa-miR-186	24.2125	25.9349	24.972	26.4173	30.3006	30.3346	31.233	29.3717	32.1583	29.4933	31.9971	29.3069	32.3066	29.459	37.2921
hsa-miR-187	30.6282	32.9602	32.4025	33.046	34.9139	NA	NA	35.9607	NA	NA	NA	38.5163	NA	NA	NA
hsa-miR-187*	NA	36.6134	NA	NA	NA	NA	NA	NA	NA	NA	NA	NA	NA	NA	NA
hsa-miR-188-5p	35.5603	35.4308	35.6343	37.0929	NA	NA	38.142	37.9843	NA	NA	NA	NA	NA	37.1813	NA
hsa-miR-18a	32.1379	26.2234	25.0269	26.7733	30.6646	32.5403	32.9997	31.3994	33.7372	32.1405	33.2588	32.9885	34.9021	32.1157	NA
hsa-miR-18a*	27.2653	28.5541	28.8703	29.1186	33.4656	33.5285	35.5574	33.251	34.7532	32.9444	35.4316	33.3224	35.4943	33.0504	NA
hsa-miR-18b	22.4828	25.0793	24.0785	25.6296	29.5091	30.6363	31.3929	29.9212	32.4107	30.4553	31.746	31.0454	33.1854	30.2744	NA
hsa-miR-190	28.9304	29.4473	29.49	30.6523	34.1848	33.9403	36.532	34.8837	37.4622	34.4304	36.1479	35.5412	40.0855	34.7988	NA
hsa-miR-191	21.1203	26.2035	22.0574	22.7	27.5005	28.3635	30.3706	29.2022	32.7823	30.1872	29.4264	29.9439	31.7799	29.3749	NA
hsa-miR-192	26.5446	27.219	28.82	27.7355	31.6316	29.3183	32.1684	29.6083	32.2383	29.2727	33.4507	29.4891	32.7856	29.2663	NA
hsa-miR-193a-3p	NA	NA	NA	NA	NA	NA	NA	NA	NA	NA	NA	NA	39.8977	NA	NA
hsa-miR-193a-5p	36.1642	35.8015	35.8602	35.5817	37.2577	36.395	36.319	35.3527	37.2562	35.5424	37.2174	35.573	36.5683	35.4935	NA
hsa-miR-193b	34.8285	32.8954	34.8747	32.7147	35.427	34.3382	35.3652	32.612	35.5741	32.487	35.8536	32.8812	35.0266	33.0895	NA
hsa-miR-194	28.4989	29.124	29.98	29.7459	33.0691	32.2082	34.8264	31.5699	34.7544	31.9971	35.1815	31.4057	35.5259	31.3452	NA
hsa-miR-195	26.7524	26.3376	28.1039	27.1895	32.0613	31.9567	33.2328	31.7255	34.4196	32.4719	34.005	32.07	34.7892	32.1558	NA
hsa-miR-196a	32.7522	33.2964	34.9899	34.2911	38.6309	NA	37.3931	NA	NA	NA	NA	NA	40.0315	NA	NA
hsa-miR-196b	26.6282	28.249	28.4936	28.7246	34.0379	33.5191	36.0455	33.686	38.1557	34.7861	37.7288	34.2296	37.0107	34.0912	NA
hsa-miR-197	22.9587	24.1033	24.512	24.6026	29.1549	29.6163	31.3216	30.919	32.3348	31.0926	30.0267	30.3537	30.7071	29.9567	38.3639
hsa-miR-1979	21.1369	22.1292	21.3914	22.4868	26.0414	26.9909	27.6982	27.9708	32.16	30.1741	28.0977	28.0168	32.0449	30.3991	NA
hsa-miR-198	NA	NA	NA	NA	NA	NA	NA	NA	NA	NA	NA	NA	NA	NA	NA
hsa-miR-199a-3p	22.9136	24.1794	23.8367	24.962	29.2993	30.4675	32.447	32.1549	35.552	32.8219	32.3788	32.4617	33.6846	32.9766	NA
hsa-miR-199a-5p	26.0344	28.9923	26.0985	29.9081	33.0572	36.7804	35.5332	35.0544	NA	NA	34.4266	NA	36.5388	37.3769	NA
hsa-miR-199b-5p	33.0107	35.5949	31.9321	35.1761	NA	NA	NA	35.8578	NA	37.092	37.9028	37.4602	NA	36.7818	NA
hsa-miR-19a	25.2329	27.4878	25.2785	28.5496	31.1443	33.7613	31.3995	30.2664	31.5106	30.5291	32.8788	31.2134	32.8298	30.2912	NA
hsa-miR-19b	19.3398	22.3572	20.4157	23.2146	25.9678	28.4047	25.9996	24.6891	26.5824	25.1859	27.599	25.7039	27.9615	24.9702	NA
hsa-miR-200a	32.0848	33.99	33.8042	33.8053	36.8885	38.6737	37.7472	36.7907	NA	36.1587	NA	36.1808	37.0701	35.8729	NA
hsa-miR-200b	31.5564	31.0215	32.0571	31.7703	37.068	36.3417	39.1793	35.2407	NA	36.0045	37.0596	36.2044	40	36.1082	NA
hsa-miR-200c	27.2068	27.3295	28.4983	28.1206	33.3719	33.6745	NA	34.5634	NA	35.0561	35.7078	34.396	NA	35.6444	NA
hsa-miR-202	NA	NA	NA	NA	NA	NA	NA	NA	37.0677	NA	NA	NA	39.6041	NA	NA
hsa-miR-202*	38.7417	NA	NA	NA	NA	NA	NA	NA	NA	NA	40.0194	38.4013	NA	NA	39.2708
hsa-miR-203	33.9655	37.9283	35.1538	37.8084	NA	NA	NA	37.6072	NA	NA	NA	NA	NA	39.2927	NA
hsa-miR-204	29.8538	29.4412	31.0667	29.7278	34.6887	33.6888	36.5103	35.2277	35.9445	35.0055	37.0673	35.478	35.6436	35.4468	NA
hsa-miR-205	32.7698	35.2092	33.2249	34.4468	34.9976	36.6767	33.8526	34.1843	34.3589	34.5469	34.5704	35.3638	35.3916	34.3482	NA
hsa-miR-206	NA	NA	NA	NA	NA	NA	NA	NA	NA	NA	NA	39.8329	NA	39.4466	NA
hsa-miR-20a	18.7113	21.1869	20.2392	21.6242	25.4899	26.1596	26.9248	25.0054	27.8948	25.0489	28.0246	25.7581	28.6317	25.0785	NA
hsa-miR-20b	28.6557	30.9706	29.7634	31.1485	33.3909	33.8169	32.8718	31.7221	33.3112	32.0984	34.001	32.7699	36.7054	32.11	NA
hsa-miR-20b*	33.4722	33.4942	29.5699	34.3677	34.9931	36.0029	38.8647	34.8725	NA	37.0616	36.6748	36.97	37.59	36.7245	NA
hsa-miR-21	NA	19.3149	20.2867	20.0487	25.2386	25.3607	27.4169	26.2524	28.7123	26.7623	27.886	26.2289	28.4438	26.3648	NA
hsa-miR-21*	32.6564	35.2268	32.4029	35.6561	NA	NA	NA	NA	NA	38.952	NA	NA	NA	NA	NA
hsa-miR-210	28.0777	30.6498	28.373	31.0958	34.6696	34.1865	32.8202	32.4713	33.1326	31.847	35.5586	32.9924	34.8115	32.9049	NA
hsa-miR-211	32.3068	32.3264	36.054	34.192	NA	36.801	NA	NA	36.8288	NA	NA	36.5212	NA	NA	NA
hsa-miR-212	NA	33.3369	33.6047	33.1187	NA	36.619	NA	37.1812	37.5377	37.7193	NA	NA	38.7564	36.4641	35.6607
hsa-miR-214	37.1864	36.9016	35.6451	36.759	36.805	35.9772	36.844	35.5126	37.1211	36.1407	37.1697	35.7401	36.2761	35.252	NA
hsa-miR-215	28.6209	29.0144	30.4963	29.1945	32.9816	30.993	32.7923	31.0924	35.1207	30.8723	34.8465	30.9329	35.6069	31.0041	NA
hsa-miR-216a	NA	NA	38.7078	NA	NA	NA	NA	NA	NA	NA	NA	NA	NA	NA	NA
hsa-miR-216b	NA	NA	NA	NA	NA	NA	NA	NA	NA	39.1936	NA	NA	NA	NA	NA
hsa-miR-217	NA	NA	NA	NA	NA	NA	NA	NA	NA	NA	NA	NA	NA	NA	NA
hsa-miR-218	38.3785	35.3234	36.4837	37.1783	36.6077	38.6697	NA	37.8963	NA	38.0298	NA	36.307	35.828	38.8963	NA
hsa-miR-219-5p	29.2023	31.4399	29.7297	31.9026	35.6137	38.9693	36.4329	37.3832	NA	37.7305	39.6967	37.3523	NA	NA	NA
hsa-miR-22	NA	27.457	27.8074	28.0812	33.3847	33.1538	34.5623	32.837	35.3817	33.0821	36.5296	32.7381	37.1764	32.9544	NA
hsa-miR-22*	28.3717	29.0817	29.0212	29.7334	33.3453	33.5832	36.4838	34.2933	35.5288	35.3863	35.7267	35.6555	NA	36.4574	NA
hsa-miR-220a	NA	NA	NA	NA	NA	NA	NA	NA	NA	NA	NA	NA	NA	NA	NA
hsa-miR-221	22.2306	24.1725	21.8512	24.3037	29.2915	30.5305	30.7983	30.2124	34.7396	32.7178	31.5516	31.651	33.5869	31.4324	NA
hsa-miR-222	23.3566	24.8252	24.2101	25.2942	29.1222	30.1217	30.0553	28.8847	30.8508	28.9351	30.7683	29.1714	31.7744	29.206	39.3597
hsa-miR-223	16.0672	16.6671	17.9915	17.0171	22.8552	22.5081	25.4644	23.9645	27.0499	24.766	24.1792	22.4307	24.3712	22.4935	NA
hsa-miR-224	30.5327	33.3761	31.0694	33.9105	35.4618	36.419	38.1581	NA	NA	37.8398	39.1336	39.6193	39.417	NA	NA
hsa-miR-23a	18.1921	20.0228	20.0378	20.5152	25.5093	26.2756	28.4261	27.2556	30.2007	28.2502	27.9054	27.0429	29.2563	27.324	NA
hsa-miR-23b	19.4701	21.3057	21.3633	21.7246	26.5095	27.2434	29.555	28.4999	31.8929	29.7455	29.1254	28.7861	31.0186	29.1706	NA
hsa-miR-24	18.1195	20.1749	20.0262	20.8235	25.1898	26.1098	27.8186	26.7788	29.5845	27.3479	27.3946	26.6644	28.6667	26.7644	NA
hsa-miR-25	22.6257	23.9177	24.6611	24.2898	28.5771	27.2129	29.3155	27.2905	30.0115	27.2326	30.6026	27.0698	30.6707	27.0626	NA
hsa-miR-26a	NA	19.1086	19.9667	19.7237	25.108	25.2213	28.2698	26.7793	31.6211	28.7146	27.8562	27.4374	30.5859	28.4671	NA
hsa-miR-26a-2*	34.241	34.0034	35.7004	35.1453	NA	NA	NA	NA	NA	NA	40.1609	39.6207	NA	NA	NA
hsa-miR-26b	28.4121	22.1676	23.2203	23.069	28.4071	27.9472	31.1942	28.8236	32.9727	29.5221	31.0039	29.8324	32.619	29.254	NA
hsa-miR-27a	18.9896	20.7356	20.8008	21.555	26.0207	27.4451	28.8558	27.9494	30.5502	28.6293	28.545	27.4813	29.1947	27.7852	NA
hsa-miR-27b	NA	21.5647	21.6369	22.5013	26.9351	28.2487	29.8261	28.6768	31.5358	29.1751	29.4455	28.665	30.1423	28.4291	NA
hsa-miR-28-5p	25.478	25.7106	24.5469	26.0158	30.4474	31.5238	33.3619	31.9047	36.6495	35.3228	34.7256	33.0551	36.8036	35.6005	NA
hsa-miR-296-5p	32.937	34.3158	33.1713	35.1111	37.2058	37.3639	36.5357	37.4605	NA	37.2883	NA	NA	NA	37.5899	NA
hsa-miR-298	NA	NA	NA	NA	NA	NA	NA	NA	NA	NA	NA	38.6168	NA	37.918	NA
hsa-miR-299-3p	NA	NA	NA	38.6207	NA	NA	NA	NA	NA	NA	NA	NA	NA	NA	NA
hsa-miR-299-5p	29.5556	29.3996	30.2955	29.8095	35.621	35.591	NA	NA	NA	NA	NA	36.5774	NA	NA	NA
hsa-miR-29a	25.7173	27.3262	26.9036	27.8895	31.4388	31.9988	32.103	31.819	33.2155	32.1686	33.9712	31.4973	34.0927	31.7376	NA
hsa-miR-29b	NA	30.2167	28.8356	31.1824	34.2096	34.5301	35.3319	33.093	35.5159	33.8153	36.1893	32.8557	37.0108	33.4083	NA
hsa-miR-29b-2*	29.1332	32.0171	29.4828	31.9571	35.0263	35.7058	NA	35.5726	35.2888	36.1927	NA	35.494	NA	34.447	NA
hsa-miR-29c	26.2055	27.8632	27.0927	28.6986	31.136	32.5186	32.0083	31.3741	32.9851	32.0098	33.6056	31.8654	33.7075	31.458	NA
hsa-miR-301a	NA	25.8908	25.1829	26.7216	30.9051	33.3657	34.7076	33.276	34.7644	33.1538	33.3569	32.91	35.7266	32.6219	NA
hsa-miR-301b	29.0299	32.4121	28.8747	32.8804	35.3927	NA	36.4762	35.5732	NA	36.9982	NA	NA	NA	35.8993	NA
hsa-miR-302a	NA	NA	NA	NA	NA	38.0759	NA	NA	NA	NA	NA	NA	NA	NA	NA
hsa-miR-302b	NA	NA	NA	NA	NA	NA	NA	NA	NA	NA	NA	NA	NA	NA	NA
hsa-miR-302c	NA	NA	36.3222	NA	NA	NA	NA	NA	NA	NA	NA	NA	NA	NA	NA
hsa-miR-302c*	NA	NA	NA	NA	NA	NA	NA	NA	NA	36.9207	NA	NA	NA	NA	NA
hsa-miR-302d	NA	NA	NA	NA	NA	NA	NA	NA	NA	NA	NA	NA	NA	NA	NA
hsa-miR-302d*	NA	39.5191	NA	37.9134	NA	NA	NA	NA	NA	NA	38.8308	NA	NA	NA	NA
hsa-miR-30a	NA	31.087	30.8965	31.4233	34.096	34.3251	35.5055	33.5778	35.5008	33.1423	35.6379	33.0584	35.7034	32.7059	NA
hsa-miR-30b	31.5324	22.1661	22.334	22.8826	27.9054	29.3469	30.272	29.2041	32.8181	30.3003	30.2991	30.0614	32.4067	30.2001	NA
hsa-miR-30b*	NA	32.9295	33.361	33.9288	37.1237	40.0161	NA	37.6399	36.935	36.3663	36.1442	NA	NA	36.3681	NA
hsa-miR-30c	20.0996	21.3647	21.8135	21.9301	26.7743	27.3183	29.4655	28.3113	32.6711	29.7787	29.4091	28.6691	31.7988	29.3749	NA
hsa-miR-30c-2*	38.5611	NA	NA	NA	NA	NA	NA	NA	NA	NA	NA	NA	NA	NA	NA
hsa-miR-30d	23.9398	23.8692	24.4683	24.1368	29.9726	29.5251	31.8769	29.9518	33.0081	30.5422	31.5966	30.2736	32.2664	30.3198	NA
hsa-miR-30e	33.1643	28.3404	26.8328	28.9846	32.4849	34.0378	33.3468	31.8966	32.8563	32.5826	34.1905	32.2314	34.8322	31.7996	NA
hsa-miR-30e*	25.4573	25.4124	26.6229	26.1765	31.6426	31.2982	34.0353	32.5375	37.796	32.7761	33.4843	32.9675	35.1406	32.7375	NA
hsa-miR-31	NA	35.6671	33.891	38.4702	36.7526	36.2978	37.0491	37.036	39.256	39.0208	NA	36.5222	NA	37.0706	NA
hsa-miR-31*	NA	36.3632	NA	37.2076	NA	NA	NA	NA	NA	37.6755	NA	37.5224	NA	NA	NA
hsa-miR-32	NA	30.0271	28.5371	30.8251	33.0327	32.8605	33.2236	31.9404	32.9822	31.8689	34.4216	31.2431	34.7027	31.8713	NA
hsa-miR-320a	21.2357	21.9459	22.4845	21.9485	26.4871	25.889	27.8587	26.3262	28.3192	26.22	28.535	26.2112	29.1233	26.4889	NA
hsa-miR-323-3p	29.9599	29.4518	31.1009	29.9316	36.1609	35.6402	NA	36.6692	NA	NA	NA	36.3994	NA	37.3963	NA
hsa-miR-324-3p	26.653	28.3621	27.2695	28.6803	32.4569	32.0728	32.9611	32.0737	34.5152	32.1283	34.2614	32.3207	34.3912	31.908	36.6997
hsa-miR-324-5p	NA	26.6339	25.4179	27.088	32.0423	32.5217	32.8882	32.1389	34.4098	31.9638	34.6808	32.3605	35.1065	32.4829	NA
hsa-miR-325	NA	NA	NA	NA	NA	NA	NA	NA	NA	NA	NA	NA	NA	NA	NA
hsa-miR-326	27.6482	27.3723	29.2798	28.5224	34.6249	34.0281	35.4296	36.1941	36.4407	NA	35.7897	35.6076	36.1036	37.2555	NA
hsa-miR-328	23.9414	25.6241	26.0356	25.9856	31.1043	31.9234	32.9109	32.4719	35.1026	33.0104	33.2789	33.0521	35.2701	32.6526	NA
hsa-miR-329	29.4752	28.1574	30.259	28.602	34.8689	33.974	36.0503	35.2835	39.0891	36.0286	36.55	36.5746	36.9596	38.2012	39.6381
hsa-miR-330-3p	27.4334	29.6693	29.0397	30.7245	33.5449	35.5975	36.2922	35.2037	NA	37.7111	36.814	35.8976	NA	37.0713	NA
hsa-miR-331-3p	23.5832	26.0388	24.3163	26.6952	30.646	33.4283	32.607	31.9555	34.6384	32.7784	32.4347	34.4218	34.8214	33.1466	NA
hsa-miR-335	26.4842	26.8847	26.0815	26.9603	31.9479	32.3866	32.9089	33.0798	35.0669	33.9334	33.1416	33.0765	34.9368	32.8321	NA
hsa-miR-337-3p	28.806	29.8583	29.9896	30.5122	35.4966	36.5925	37.6233	35.5755	39.4515	36.154	37.4267	36.2782	38.6922	36.415	NA
hsa-miR-337-5p	NA	33.3302	34.3874	33.3077	NA	NA	NA	37.0526	NA	NA	NA	NA	NA	NA	NA
hsa-miR-338-3p	29.3894	31.044	27.8428	31.292	34.4713	36.12	34.0822	35.4901	36.3163	NA	35.7571	34.9201	36.4719	34.0835	NA
hsa-miR-339-5p	NA	26.2399	24.7515	26.9385	30.1283	33.0591	33.2958	33.2384	35.8587	35.6847	33.0063	34.5489	36.5064	35.6784	NA
hsa-miR-33a	27.9155	30.1287	28.6736	30.3194	36.0519	35.0853	35.1385	35.7852	37.604	34.9383	NA	36.6315	NA	36.1434	38.5261
hsa-miR-33b	NA	29.8763	31.5371	30.79	NA	37.4999	38.8727	37.7833	NA	35.9508	NA	35.873	NA	35.0891	NA
hsa-miR-340	29.0323	29.0838	29.488	31.0362	34.5272	36.4974	37.4273	36.5692	39.1847	39.6791	37.2311	36.3798	39.199	36.9272	NA
hsa-miR-342-3p	22.557	24.2094	23.9044	24.6478	27.5645	28.265	28.9785	28.6333	30.6776	28.9588	29.3667	28.4357	30.292	28.9161	NA
hsa-miR-345	28.7946	31.5968	29.0799	32.5163	34.231	39.153	34.3511	34.9026	36.1459	34.7806	36.5964	35.238	35.7823	34.2386	NA
hsa-miR-346	36.1754	35.7665	33.4798	35.0634	38.0176	34.6058	35.4298	34.6925	35.4018	35.285	35.5581	36.4351	35.6911	34.9963	35.063
hsa-miR-34a	31.9585	31.99	31.5537	32.2045	37.9738	34.8886	38.0502	35.6224	35.2953	34.3409	NA	35.607	NA	35.0657	NA
hsa-miR-34b	39.1017	38.5189	37.2488	36.1892	NA	NA	NA	NA	NA	NA	NA	NA	NA	NA	NA
hsa-miR-34c-3p	NA	NA	NA	37.5426	NA	NA	NA	NA	NA	NA	NA	NA	NA	NA	NA
hsa-miR-34c-5p	NA	NA	NA	NA	NA	NA	NA	NA	NA	NA	NA	NA	NA	NA	NA
hsa-miR-361-3p	30.4744	30.4029	29.8051	31.1446	36.9097	34.5074	35.5265	35.5248	NA	37.9976	39.2727	35.7159	NA	36.8315	NA
hsa-miR-361-5p	31.5554	30.1491	32.3252	31.0762	38.3805	37.1234	NA	38.0001	NA	NA	40.0166	39.9565	NA	NA	NA
hsa-miR-362-5p	33.9969	35.4879	33.5878	35.489	38.2449	39.1141	36.465	37.5341	39.3622	NA	NA	38.3796	NA	NA	39.2184
hsa-miR-363	29.2693	30.4893	29.2473	31.5508	34.2973	34.2116	33.7832	32.6623	34.522	32.723	35.618	32.9456	36.169	32.1085	NA
hsa-miR-363*	NA	NA	NA	NA	NA	NA	NA	NA	NA	NA	NA	NA	NA	NA	NA
hsa-miR-365	NA	31.7401	32.3053	31.4682	34.6073	33.9033	35.28	32.6833	34.9297	32.5171	34.9588	32.6645	34.589	31.7413	NA
hsa-miR-367	NA	NA	NA	NA	NA	NA	NA	NA	NA	NA	NA	NA	NA	NA	NA
hsa-miR-369-5p	28.5309	28.3315	30.1062	29.0066	NA	33.944	NA	35.4389	NA	NA	36.9144	35.3926	NA	37.2186	NA
hsa-miR-370	31.9104	28.3489	30.4205	28.7798	35.7617	34.0823	NA	38.0635	NA	36.7124	36.8073	36.6029	NA	NA	NA
hsa-miR-371-3p	NA	NA	NA	NA	NA	NA	NA	NA	NA	NA	NA	NA	NA	NA	NA
hsa-miR-371-5p	NA	NA	NA	NA	NA	NA	NA	NA	NA	38.5765	NA	NA	NA	NA	NA
hsa-miR-372	NA	NA	38.2992	NA	NA	NA	NA	NA	NA	NA	39.511	NA	NA	NA	NA
hsa-miR-373	NA	NA	38.0222	NA	NA	NA	NA	NA	NA	NA	NA	NA	NA	38.8115	NA
hsa-miR-373*	NA	35.1227	38.2058	37.63	NA	35.9821	NA	37.6384	NA	35.7677	NA	36.4371	NA	35.8528	NA
hsa-miR-374a	23.945	24.2497	25.4873	25.5633	31.1057	31.5377	34.4013	32.1576	35.3307	33.8593	32.932	32.7033	35.6556	33.2475	NA
hsa-miR-374b	22.0203	22.9883	24.0184	23.7376	29.3952	29.3784	32.9109	31.5465	35.5493	32.6214	32.1641	31.816	34.4252	32.3333	NA
hsa-miR-374b*	NA	32.5954	35.1495	33.0295	NA	37.4242	NA	NA	NA	38.4723	NA	NA	NA	NA	NA
hsa-miR-375	32.5482	32.206	33.1616	31.9202	34.3089	32.4175	33.7585	32.7614	34.479	32.0746	34.695	32.3252	34.6779	32.5045	NA
hsa-miR-376a	26.3014	26.0781	26.9641	27.0427	33.3789	32.8574	36.3005	33.7205	NA	35.2782	36.1951	33.8702	37.7564	35.5812	NA
hsa-miR-376b	30.74	30.5123	30.4068	31.2709	37.6	39.2802	NA	38.0131	NA	NA	NA	NA	NA	38.0206	NA
hsa-miR-376c	25.6687	25.9785	26.9349	26.6955	33.2707	33.2012	35.4833	33.0675	37.3852	35.2979	35.8959	34.028	39.2652	35.9061	NA
hsa-miR-377	38.1478	35.2192	34.7307	35.8628	39.3368	NA	NA	NA	NA	NA	39.2091	NA	NA	NA	NA
hsa-miR-378	26.4715	27.8602	28.0733	28.2386	31.4376	31.9318	32.7863	30.9069	32.2474	31.023	32.8696	30.3823	33.1374	30.5418	NA
hsa-miR-379	NA	27.7467	30.105	28.1995	35.9249	33.7649	NA	35.6563	NA	39.6317	NA	39.3115	NA	39.2353	NA
hsa-miR-381	34.5271	32.1324	33.5384	33.7199	38.3407	38.3284	NA	NA	35.5451	NA	37.8507	36.9239	NA	36.7722	NA
hsa-miR-382	25.6571	26.0228	27.4302	26.3385	32.5059	31.6501	36.2682	33.0394	NA	37.0121	36.3268	35.5804	35.788	34.5375	NA
hsa-miR-383	NA	NA	NA	NA	NA	NA	NA	NA	NA	NA	NA	NA	NA	NA	NA
hsa-miR-409-3p	NA	24.2963	26.2406	24.8007	31.3906	30.109	34.1249	32.1369	NA	35.1915	35.7711	32.7128	34.8051	34.9891	NA
hsa-miR-410	29.2133	29.4876	29.3404	30.1325	37.4539	35.4214	37.3985	36.6042	NA	37.7276	37.2631	38.1306	NA	37.8515	NA
hsa-miR-411	29.4675	26.9294	28.5536	27.5014	33.1716	32.9362	37.699	34.2364	NA	NA	NA	36.5769	NA	36.4935	NA
hsa-miR-421	26.2288	27.2768	28.4515	27.6829	32.6351	32.3383	34.899	32.9646	35.9404	33.7696	35.0417	32.8067	35.3216	33.2175	NA
hsa-miR-422a	NA	NA	NA	NA	NA	NA	NA	NA	NA	39.4187	NA	NA	NA	NA	NA
hsa-miR-423-3p	22.4394	24.1382	23.3128	24.639	29.0629	29.5481	30.9637	30.7428	32.9947	32.0933	31.2825	31.2098	33.5857	31.4055	NA
hsa-miR-423-5p	24.3574	25.482	25.4861	25.9541	29.9	30.1391	30.9045	30.4157	32.0757	30.696	31.639	30.9262	32.6758	30.4329	NA
hsa-miR-424	26.6472	27.5421	27.7504	28.3541	31.4776	32.3412	32.6354	32.1905	32.7503	32.8274	33.5762	31.4395	35.0734	31.9394	NA
hsa-miR-425	22.9048	24.0492	23.8933	24.9649	29.1215	29.9155	30.4615	29.8474	31.9029	30.7869	31.7209	30.3897	32.9651	30.2053	NA
hsa-miR-425*	NA	26.27	26.8006	27.1546	32.3636	33.3806	33.3582	32.6344	36.2083	32.989	34.6441	32.6733	34.8508	32.4888	NA
hsa-miR-429	NA	32.6896	33.2383	33.4287	37.3789	37.9936	NA	37.2951	NA	37.7466	NA	36.1161	NA	NA	NA
hsa-miR-431	28.9657	29.9477	30.007	30.7333	36.5975	36.3769	NA	36.655	NA	39.0429	37.5626	NA	NA	38.2122	NA
hsa-miR-432	29.5284	28.2349	30.2697	29.1064	35.2224	34.012	NA	35.575	NA	37.7565	37.0304	35.1772	NA	37.854	NA
hsa-miR-433	31.6101	31.8773	32.0568	32.1709	38.0119	37.3223	NA	NA	40.0166	NA	NA	NA	38.9018	NA	NA
hsa-miR-449a	35.4308	34.3736	34.966	35.2058	NA	NA	NA	NA	NA	NA	NA	NA	NA	NA	NA
hsa-miR-449b	NA	36.7887	39.5735	NA	NA	NA	NA	NA	NA	NA	NA	NA	NA	NA	NA
hsa-miR-450a	32.1212	32.1118	32.9219	32.9667	38.1368	37.648	NA	39.9681	NA	NA	37.1737	39.7063	38.0067	36.3108	NA
hsa-miR-451	NA	22.7393	21.8953	22.6664	23.4527	23.2483	23.2782	21.657	23.7391	21.9124	26.5202	22.3698	26.334	21.697	NA
hsa-miR-452	28.3518	31.7273	29.251	31.8322	34.2677	NA	35.3957	NA	39.7689	35.7748	36.74	38.109	37.9825	37.2786	NA
hsa-miR-454	26.5668	27.7145	28.5084	28.0198	33.214	32.7731	36.9186	33.3516	39.0286	34.8602	35.8926	34.5909	37.8119	35.3071	NA
hsa-miR-455-5p	38.5747	38.2474	NA	38.3974	NA	NA	NA	39.1339	NA	NA	NA	NA	NA	38.536	NA
hsa-miR-483-3p	NA	35.0513	35.853	35.3274	37.5925	35.5392	36.6617	36.1144	37.1027	35.9905	36.4455	36.4267	37.827	36.1789	NA
hsa-miR-484	22.3059	23.5435	23.2202	24.2725	28.5309	28.6938	29.7092	28.4301	30.576	28.7189	30.1472	28.4713	31.1421	28.5446	34.9426
hsa-miR-486-5p	23.5255	23.5447	24.6697	23.8456	26.4267	25.0274	26.8062	25.0509	27.4047	25.1702	28.2862	24.9402	28.8891	24.9866	NA
hsa-miR-487b	30.2158	28.4217	31.1561	29.0747	35.737	34.6757	NA	36.8364	NA	39.3517	38.4201	37.0435	NA	38.0079	NA
hsa-miR-488	NA	NA	NA	NA	NA	NA	NA	NA	NA	NA	NA	NA	NA	NA	NA
hsa-miR-490-3p	NA	34.6211	34.7358	33.7022	35.5221	35.8577	35.3577	35.0178	35.0986	34.7461	35.6234	35.3676	34.6078	34.616	35.3206
hsa-miR-491-3p	33.7289	35.9666	34.7179	35.5923	39.7835	38.1487	NA	39.6308	NA	NA	NA	NA	NA	NA	NA
hsa-miR-491-5p	27.1199	29.3807	28.106	29.9185	33.4395	38.0321	35.2391	34.5503	NA	36.8327	36.0735	35.6226	37.4365	35.9694	NA
hsa-miR-492	NA	NA	NA	NA	NA	NA	NA	NA	NA	NA	NA	NA	NA	NA	NA
hsa-miR-493	29.09	29.2193	31.0157	29.6329	37.1451	36.618	NA	35.9451	NA	NA	37.0746	NA	NA	37.2668	NA
hsa-miR-494	NA	31.5695	33.2213	32.5418	37.9472	38.2795	NA	NA	NA	NA	NA	39.3415	NA	39.6039	NA
hsa-miR-495	27.2094	26.0027	28.2558	26.5227	32.7547	31.4958	35.5778	34.4549	39.1577	36.3461	NA	33.9297	NA	35.91	37.2729
hsa-miR-497	35.5638	32.7514	32.9861	32.61	NA	36.2385	38.61	35.4575	NA	38.8851	37.4716	NA	NA	36.066	NA
hsa-miR-498	NA	NA	NA	NA	NA	NA	NA	NA	NA	NA	NA	NA	NA	NA	NA
hsa-miR-499-5p	NA	34.8808	35.6164	34.829	NA	39.7452	NA	38.4138	NA	NA	NA	NA	NA	38.5205	NA
hsa-miR-500	NA	32.4038	32.2413	32.6827	35.5772	35.8826	36.8056	34.4369	35.9457	35.1511	36.2224	35.8764	37.6819	34.4501	NA
hsa-miR-501-5p	31.2909	32.8774	32.3625	32.53	35.1486	34.4679	35.4954	33.0682	NA	35.3395	NA	35.7637	36.7504	34.2205	NA
hsa-miR-502-5p	33.6166	34.5984	32.1741	34.9446	36.2988	38.5181	37.0528	35.8808	38.1814	38.7028	37.3464	37.1411	38.3919	37.5252	37.6632
hsa-miR-503	29.6541	31.409	30.4869	31.72	36.0109	38.5594	36.3268	38.9995	NA	38.5672	NA	36.0246	37.6077	37.556	NA
hsa-miR-505	26.2937	27.3589	27.4689	28.0275	32.6073	32.0159	33.9187	31.9034	35.5729	32.5054	35.1104	32.6503	34.6347	32.6124	NA
hsa-miR-506	37.7683	35.3785	37.3787	37.05	NA	NA	NA	NA	NA	NA	NA	NA	NA	NA	NA
hsa-miR-508-3p	NA	NA	NA	NA	NA	NA	NA	NA	NA	NA	NA	NA	NA	NA	NA
hsa-miR-509-3-5p	37.2485	NA	NA	NA	NA	NA	NA	NA	NA	NA	NA	NA	NA	NA	NA
hsa-miR-509-3p	NA	39.8394	37.9427	36.8029	NA	37.0742	38.276	NA	NA	NA	39.4624	35.4505	NA	37.1096	36.2166
hsa-miR-510	NA	NA	NA	NA	NA	NA	NA	NA	NA	NA	NA	NA	NA	NA	NA
hsa-miR-512-5p	NA	NA	40.036	NA	NA	NA	NA	NA	NA	NA	NA	NA	NA	NA	NA
hsa-miR-513a-5p	NA	NA	NA	NA	NA	NA	NA	NA	NA	NA	NA	NA	NA	NA	NA
hsa-miR-514	38.4505	NA	NA	NA	NA	NA	NA	NA	NA	NA	NA	NA	NA	NA	NA
hsa-miR-516a-5p	NA	NA	NA	NA	NA	NA	NA	NA	NA	NA	NA	NA	NA	NA	NA
hsa-miR-516b	NA	NA	NA	NA	NA	NA	NA	NA	NA	NA	NA	NA	NA	NA	NA
hsa-miR-517a	NA	NA	38.6083	NA	NA	NA	NA	NA	NA	NA	NA	NA	NA	NA	NA
hsa-miR-517c	38.8288	NA	36.9908	NA	NA	NA	NA	39.0695	NA	NA	NA	NA	NA	NA	NA
hsa-miR-518a-3p	NA	NA	37.2563	NA	NA	NA	NA	NA	NA	NA	NA	NA	NA	NA	NA
hsa-miR-518b	NA	NA	NA	37.8732	37.8244	NA	NA	NA	NA	NA	NA	NA	NA	NA	NA
hsa-miR-518c	NA	NA	NA	NA	NA	NA	NA	NA	NA	NA	NA	NA	NA	NA	NA
hsa-miR-518c*	NA	NA	37.9232	NA	NA	NA	NA	NA	NA	NA	NA	NA	NA	37.8943	NA
hsa-miR-518e	37.1373	NA	36.9615	NA	NA	NA	NA	NA	NA	NA	NA	NA	NA	NA	NA
hsa-miR-518f	37.4508	39.8307	36.8068	36.6137	NA	NA	NA	39.2788	NA	NA	NA	NA	NA	NA	NA
hsa-miR-519a	NA	38.4523	NA	38.878	NA	NA	NA	NA	NA	NA	NA	NA	39.9167	38.8781	NA
hsa-miR-519d	NA	38.6416	NA	NA	NA	NA	NA	NA	NA	35.5561	NA	NA	NA	NA	NA
hsa-miR-520c-3p	36.5007	NA	NA	38.2012	NA	NA	NA	NA	NA	NA	NA	NA	NA	NA	NA
hsa-miR-520d-5p	NA	NA	NA	NA	NA	NA	34.5772	NA	NA	NA	38.497	NA	NA	37.7363	NA
hsa-miR-521	NA	NA	NA	NA	NA	NA	38.3537	NA	NA	NA	NA	NA	NA	NA	NA
hsa-miR-523	NA	NA	NA	NA	NA	NA	NA	38.8358	NA	39.309	NA	36.3952	NA	NA	36.5923
hsa-miR-524-3p	NA	NA	NA	NA	NA	NA	NA	NA	NA	NA	NA	NA	NA	NA	NA
hsa-miR-524-5p	36.7438	38.1845	37.7017	35.4243	35.6545	36.1382	35.0861	35.55	37.0654	36.2771	37.0121	35.3917	37.5091	39.2496	36.412
hsa-miR-525-5p	NA	37.2134	39.2547	37.5056	37.596	38.167	36.5809	38.7943	NA	39.6411	38.7604	39.7488	NA	37.3307	NA
hsa-miR-526b	NA	35.3612	37.8277	NA	36.1977	37.8382	NA	NA	NA	NA	36.3385	39.639	36.9921	NA	NA
hsa-miR-532-5p	28.2029	29.4664	29.3325	29.9658	33.0399	32.3047	33.5145	31.2064	34.5705	31.4669	35.2597	31.4907	34.6031	31.8631	NA
hsa-miR-539	NA	31.8028	33.1367	33.0143	39.6947	38.7223	NA	NA	NA	NA	NA	NA	NA	NA	NA
hsa-miR-542-5p	32.7569	33.0586	32.8158	34.1812	NA	36.7999	NA	NA	NA	NA	NA	NA	38.9275	35.5416	39.4895
hsa-miR-545	33.5993	34.5018	31.4499	37.7849	37.0402	40.0985	NA	36.3035	NA	38.0912	38.2569	39.4675	NA	38.3463	NA
hsa-miR-548b-3p	NA	39.4991	NA	NA	NA	NA	NA	37.2387	NA	38.9124	NA	37.0029	NA	NA	NA
hsa-miR-548c-3p	36.7051	37.5704	36.6499	37.6433	NA	NA	NA	NA	NA	NA	NA	NA	NA	NA	NA
hsa-miR-549	NA	38.8612	NA	39.0318	NA	NA	NA	NA	NA	NA	NA	NA	NA	NA	NA
hsa-miR-550	31.8524	32.7976	33.0971	33.508	36.2034	38.2637	36.363	36.3804	NA	NA	NA	36.3496	38.7932	NA	NA
hsa-miR-551b	27.1799	29.4017	28.0212	30.0408	34.7939	35.4637	36.1607	35.3162	NA	NA	NA	35.6498	NA	NA	NA
hsa-miR-557	NA	NA	NA	NA	NA	NA	NA	NA	NA	39.1389	NA	NA	NA	NA	NA
hsa-miR-570	33.2841	35.6042	33.0669	37.2829	NA	38.2553	38.2223	37.58	36.9155	NA	NA	36.8829	38.9012	39.6299	NA
hsa-miR-572	NA	NA	39.86	38.9831	NA	NA	NA	NA	NA	37.9134	38.9079	38.6799	NA	NA	NA
hsa-miR-574-3p	23.6648	25.8146	25.439	25.9363	29.9792	29.5812	31.9506	29.0624	33.1209	31.0366	31.7195	31.7916	33.5636	31.9742	33.3108
hsa-miR-576-3p	NA	33.0436	32.6832	33.9132	NA	NA	NA	36.6909	39.1986	NA	NA	36.8365	NA	37.9734	NA
hsa-miR-576-5p	31.1832	31.3432	32.5123	32.0902	36.1385	35.5771	38.5574	35.9822	38.1873	36.4246	NA	35.7271	39.232	35.6246	NA
hsa-miR-582-5p	NA	34.6966	34.6151	34.1325	35.5123	36.1971	35.8295	35.8328	36.4932	NA	38.365	34.911	35.7943	34.27	NA
hsa-miR-583	NA	NA	NA	NA	NA	NA	NA	NA	NA	NA	NA	NA	NA	NA	NA
hsa-miR-584	26.2629	26.0458	27.2469	26.7401	32.1885	32.5477	35.0125	32.9742	37.6445	34.3868	34.3654	33.192	35.8847	34.2387	38.7642
hsa-miR-589	NA	31.4186	31.4404	31.7059	36.4561	37.3683	39.5734	NA	NA	36.2362	35.4217	38.1519	37.7945	35.6367	NA
hsa-miR-590-5p	22.5748	24.4854	25.4165	25.1515	30.1982	31.02	33.1424	31.1024	32.8729	30.7456	32.5581	30.2166	33.2781	30.9524	NA
hsa-miR-595	NA	NA	36.2692	38.504	39.4655	35.7367	36.5725	36.4831	39.1876	39.4253	35.7527	38.4771	39.2937	39.0929	35.6432
hsa-miR-596	NA	NA	39.1757	NA	NA	NA	NA	NA	NA	NA	NA	NA	NA	NA	NA
hsa-miR-597	NA	38.3572	NA	NA	NA	NA	39.4258	NA	NA	NA	NA	NA	NA	NA	NA
hsa-miR-598	26.1791	27.2463	28.3966	27.976	33.3476	32.811	33.0564	33.8075	36.1785	32.774	34.4499	33.1562	36.2466	33.0745	35.4127
hsa-miR-602	NA	39.8211	38.2358	NA	NA	NA	37.0047	NA	NA	38.4504	37.3027	36.6722	NA	NA	38.0472
hsa-miR-608	NA	NA	NA	NA	NA	NA	NA	NA	NA	NA	NA	NA	NA	NA	NA
hsa-miR-615-3p	37.6789	36.0627	35.4748	36.6383	36.6442	36.7941	35.5235	36.0469	36.5208	35.9854	35.8415	36.6757	36.3467	36.8721	36.4749
hsa-miR-617	NA	NA	NA	NA	NA	NA	NA	NA	NA	NA	NA	NA	NA	NA	NA
hsa-miR-620	NA	NA	NA	NA	NA	NA	NA	NA	NA	NA	NA	NA	NA	NA	NA
hsa-miR-622	36.146	34.0442	33.3436	33.9826	34.7759	33.9067	33.9839	33.0696	35.0197	34.2605	34.2333	35.1153	34.5751	35.4669	32.4281
hsa-miR-623	NA	NA	NA	NA	NA	NA	NA	NA	NA	NA	NA	NA	NA	NA	NA
hsa-miR-625*	29.5812	26.565	28.4985	27.2693	33.3519	32.9565	35.9044	33.9314	NA	35.251	35.6098	35.0058	37.2942	35.6166	NA
hsa-miR-627	29.4516	31.4924	31.0558	32.0662	36.0582	35.5255	37.7823	34.9539	38.8026	35.1215	35.7788	35.3102	NA	34.4913	NA
hsa-miR-628-3p	27.5691	27.2378	28.1774	27.9959	32.7676	33.4	34.7062	34.2448	37.946	33.438	34.1276	34.3949	35.9244	33.691	NA
hsa-miR-629	NA	32.056	31.0464	31.9379	34.5387	35.6327	35.6337	34.3331	36.8353	34.369	36.6198	34.8834	36.6537	34.3936	NA
hsa-miR-631	NA	NA	NA	NA	NA	NA	NA	NA	NA	NA	NA	NA	NA	NA	NA
hsa-miR-637	NA	NA	NA	NA	NA	NA	NA	NA	NA	NA	NA	NA	NA	NA	NA
hsa-miR-642	NA	36.5975	38.3433	37.0921	38.4728	37.3855	NA	38.4042	38.4898	38.4938	37.5936	NA	36.9298	39.517	NA
hsa-miR-651	31.1679	32.8335	32.5856	32.7725	36.0896	36.2437	36.7195	NA	NA	37.1714	NA	35.8772	37.249	36.8045	NA
hsa-miR-652	25.236	26.1492	25.2226	26.6348	31.7586	32.3181	33.2026	31.97	35.3607	32.2469	34.631	32.6954	35.4756	32.3041	NA
hsa-miR-654-5p	29.5907	29.4988	31.0615	30.1884	36.2502	34.6476	NA	38.1705	NA	NA	NA	36.8214	NA	NA	NA
hsa-miR-658	NA	NA	38.785	NA	NA	NA	NA	NA	NA	NA	NA	NA	NA	NA	NA
hsa-miR-660	NA	32.2456	31.0824	32.3611	34.9227	35.3386	35.5533	33.1423	35.0026	34.1248	36.5548	33.9158	37.1644	33.8904	NA
hsa-miR-662	38.3402	37.7525	38.8163	NA	NA	NA	NA	39.7678	39.6444	NA	NA	36.842	NA	38.4782	36.8973
hsa-miR-663	34.8775	37.0551	35.6249	35.3028	36.524	36.5063	37.4467	35.4854	35.8866	35.3178	36.9643	36.5481	36.1066	35.5338	37.4976
hsa-miR-665	35.5842	35.1789	34.4924	35.578	39.3034	36.7521	37.2365	38.9839	38.5277	37.9463	35.0881	34.6195	34.8729	32.7858	NA
hsa-miR-668	32.4974	32.9234	35.0933	32.7378	NA	36.5684	NA	39.4014	NA	NA	NA	NA	NA	NA	NA
hsa-miR-671-5p	31.6738	33.6269	32.4307	34.1795	36.998	36.5231	36.0365	35.2826	38.4478	35.274	35.5991	35.6898	37.5051	35.4364	38.1542
hsa-miR-7	30.6287	30.4299	30.6524	31.2916	33.1761	34.2507	34.7749	33.1037	35.5823	33.7968	35.6396	33.587	36.1233	34.4055	NA
hsa-miR-708	35.9869	34.0538	35.5652	35.4097	NA	37.9166	NA	NA	NA	NA	NA	NA	NA	NA	NA
hsa-miR-720	24.8399	26.0254	25.4278	26.3198	29.5319	29.9273	29.3503	29.0375	30.3865	29.69	29.7597	29.1656	30.7205	29.1062	35.5422
hsa-miR-744	27.498	28.4229	27.5197	29.0405	34.0317	35.5216	35.8015	35.2451	38.8046	36.2437	35.7947	36.4359	38.5919	36.0081	NA
hsa-miR-760	32.5227	34.0158	32.9705	33.6837	37.3888	34.7701	35.132	35.5968	36.6924	36.0093	35.708	35.3945	37.0522	35.8063	34.4322
hsa-miR-765	NA	37.8421	NA	38.0086	NA	NA	38.286	NA	NA	NA	NA	NA	NA	NA	NA
hsa-miR-766	23.5557	24.8009	25.4869	24.868	30.0852	30.5561	33.168	32.7516	39.2382	33.0956	32.5052	33.1409	35.5894	33.1513	NA
hsa-miR-802	NA	NA	NA	NA	NA	NA	NA	NA	NA	NA	NA	NA	NA	NA	NA
hsa-miR-873	37.7253	NA	NA	36.601	NA	NA	NA	NA	NA	NA	NA	NA	37.4682	NA	NA
hsa-miR-877	28.7946	29.9533	30.39	30.1103	34.8755	34.9214	38.2252	35.7842	NA	NA	38.0989	35.9551	37.2483	36.7637	NA
hsa-miR-885-5p	35.6231	33.0068	36.1402	33.5588	36.0349	34.4728	37.1703	33.7459	38.0787	32.9171	38.0689	34.1766	38.2058	33.972	NA
hsa-miR-886-3p	NA	31.5867	31.5235	32.0561	NA	38.7209	NA	NA	NA	NA	NA	36.9508	NA	NA	NA
hsa-miR-886-5p	NA	31.0486	31.6693	30.9899	35.7249	34.6876	38.3884	33.9981	NA	38.2072	34.3985	34.6383	NA	35.4597	NA
hsa-miR-887	NA	NA	NA	NA	NA	NA	NA	NA	38.4602	NA	NA	NA	NA	39.2121	NA
hsa-miR-888	37.3065	36.5966	37.2563	36.2156	36.1817	36.2408	36.853	37.2008	37.008	36.5579	38.3901	36.6323	37.2308	37.6691	38.0575
hsa-miR-890	NA	NA	NA	NA	NA	NA	NA	NA	NA	NA	NA	NA	NA	NA	NA
hsa-miR-891a	NA	NA	36.5805	NA	NA	NA	NA	NA	NA	NA	NA	NA	NA	38.3507	NA
hsa-miR-9	29.6266	31.6427	31.7093	31.7979	37.1819	37.8588	NA	37.8878	NA	37.8668	38.0057	38.1984	NA	NA	NA
hsa-miR-9*	38.0035	35.6392	35.0747	35.7903	NA	38.5632	NA	NA	NA	39.5077	NA	NA	NA	NA	NA
hsa-miR-921	NA	NA	NA	NA	NA	NA	NA	NA	NA	NA	NA	35.6568	NA	NA	NA
hsa-miR-92a	19.7192	21.3091	21.3326	21.7396	25.3005	24.8301	26.251	24.583	26.9564	24.7906	27.0815	24.8544	27.4967	24.7646	NA
hsa-miR-92a-1*	31.6555	33.0355	33.164	32.8803	NA	37.1054	36.4621	36.3991	NA	NA	NA	NA	NA	NA	NA
hsa-miR-92b	29.0275	29.1184	30.1081	29.959	34.6118	33.2945	34.502	34.2882	35.474	34.8701	35.4155	35.0424	36.1477	34.9384	NA
hsa-miR-93	20.4874	23.381	21.9123	23.9355	26.9862	28.0583	27.9201	26.3792	28.759	26.7334	29.2821	27.4596	29.6508	26.4488	NA
hsa-miR-933	34.5599	34.3265	37.0228	35.1889	NA	NA	NA	NA	NA	NA	NA	NA	NA	NA	NA
hsa-miR-934	33.1091	35.0717	33.3079	33.7506	33.2735	33.2711	33.2473	32.7925	33.9638	NA	34.3904	33.3196	33.3214	33.744	33.2824
hsa-miR-940	29.6672	30.4744	31.4082	31.0203	35.5091	34.8867	34.7517	35.4065	35.6355	35.3502	35.4865	35.216	35.7757	35.7037	NA
hsa-miR-95	34.9343	34.4066	35.5136	34.2516	35.1657	35.288	36.2991	34.3277	37.1229	35.3956	36.6884	35.4269	37.2642	34.178	NA
hsa-miR-96	38.513	37.6798	36.3288	37.3514	NA	39.4755	39.2597	35.8564	36.936	37.9239	NA	37.9796	NA	36.7476	39.3643
hsa-miR-96*	NA	NA	NA	NA	NA	NA	NA	NA	NA	NA	NA	NA	NA	NA	NA
hsa-miR-98	NA	28.0933	28.4267	28.4477	33.7408	34.0255	36.6864	35.8146	NA	37.6461	36.8401	37.2452	NA	37.1478	NA
hsa-miR-99a	26.5821	28.3773	27.945	28.9771	33.2059	32.2243	33.3007	32.0496	35.0087	31.9106	35.6369	32.573	35.8691	32.4811	NA
hsa-miR-99a*	34.7245	35.6223	36.0593	35.2708	NA	39.3619	NA	36.3844	NA	36.0514	NA	NA	NA	NA	38.7148
hsa-miR-99b	23.5988	24.5485	25.2805	25.1667	30.0468	30.0931	32.0994	31.3022	34.5568	32.2064	32.4002	32.514	33.4514	32.3807	NA
